# Supplementary material for: Dynamics of immune memory and learning in bacterial communities
Source: eLife journal article supplement (doi:10.7554/elife.81692), 2023-01-16
Supplement: supp [file elife-81692-supp-v1.zip]

Simulation mean number of bacteria clones

 $e = 0.1$ 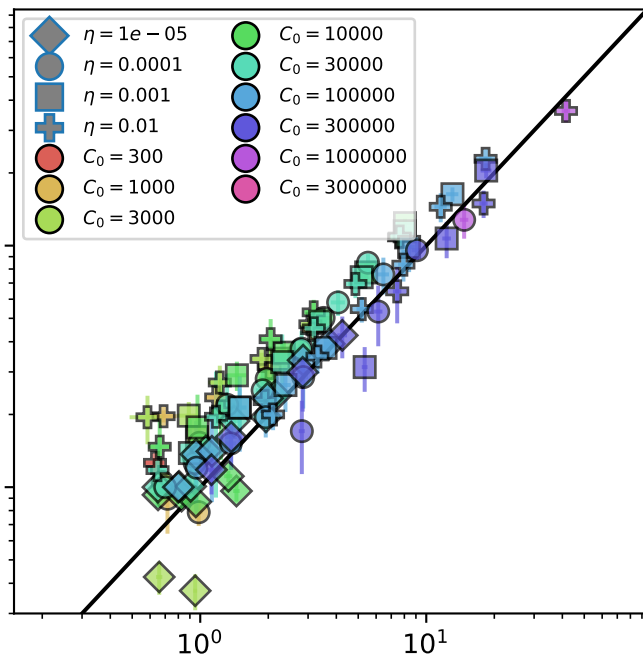 $e = 0.5$ 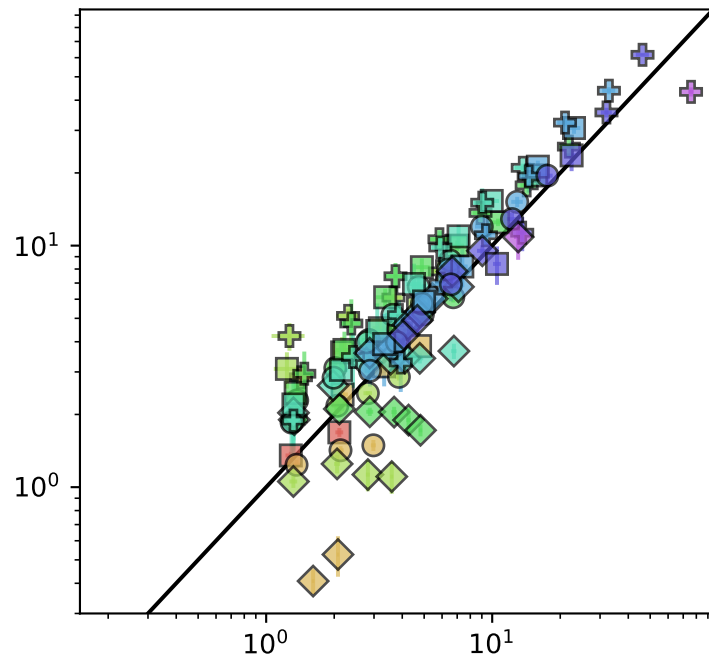

Simulation mean number of bacteria clones

 $e = 0.8$ 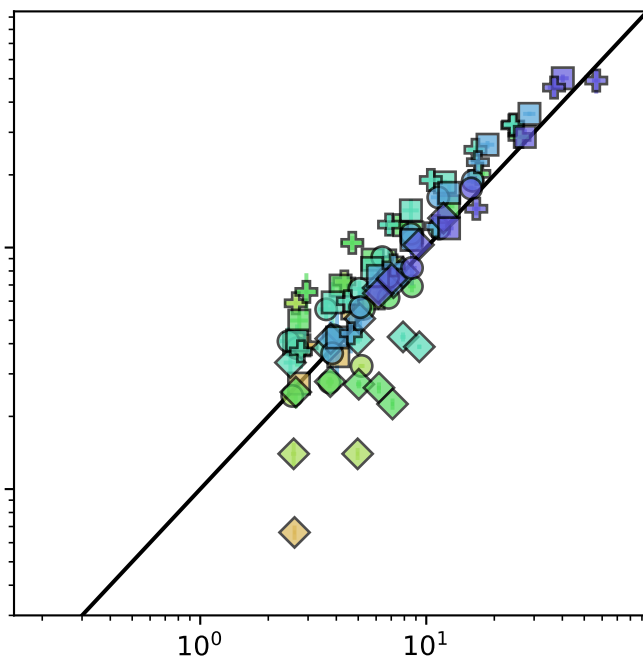

Predicted mean number of bacteria clones

 $e = 0.95$ 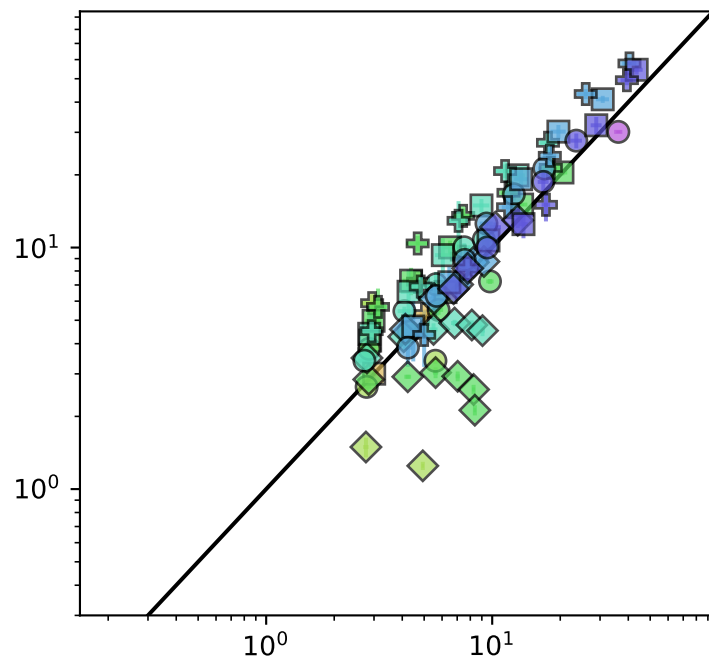

Predicted mean number of bacteria clones
