# Supplementary material for: Dynamics of immune memory and learning in bacterial communities
Source: eLife journal article supplement (doi:10.7554/elife.81692), 2023-01-16
Supplement: supp [file elife-81692-supp-v1.zip]

$\mu = 1e-08$ 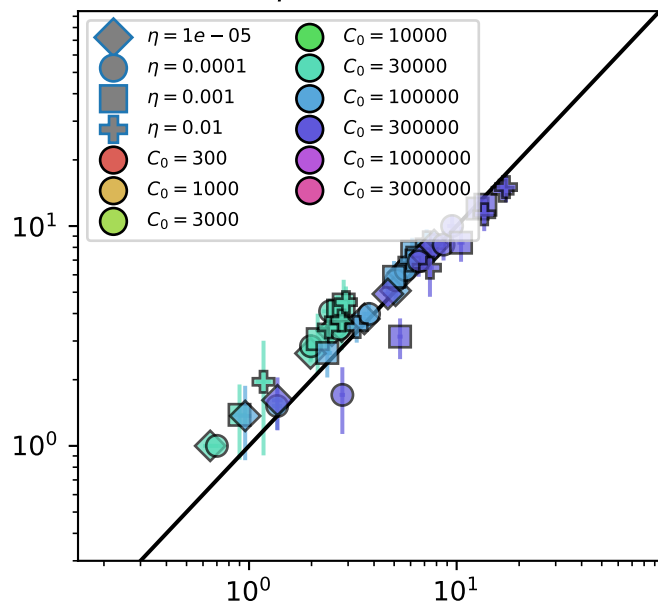 $\mu = 3e-08$ 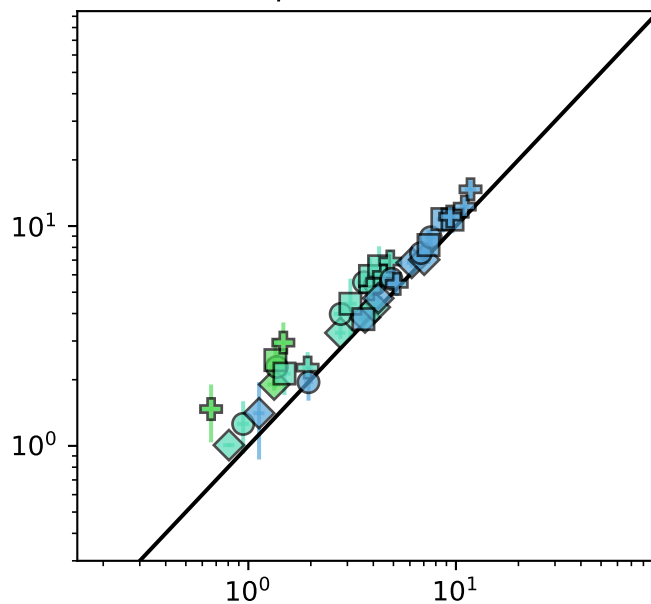 $\mu = 1e-07$ 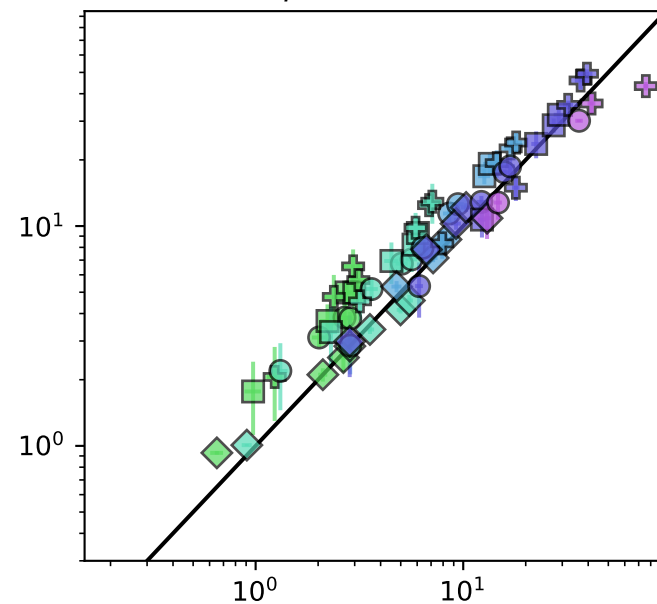 $\mu = 3.2e-07$ 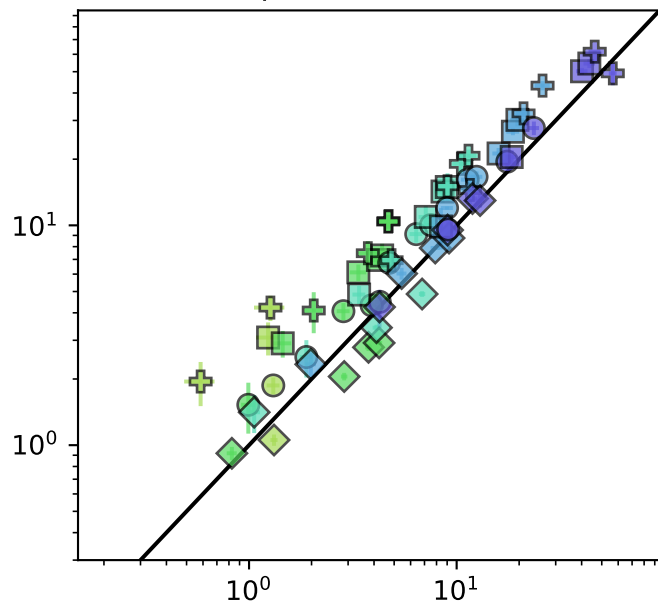 $\mu = 1e-06$ 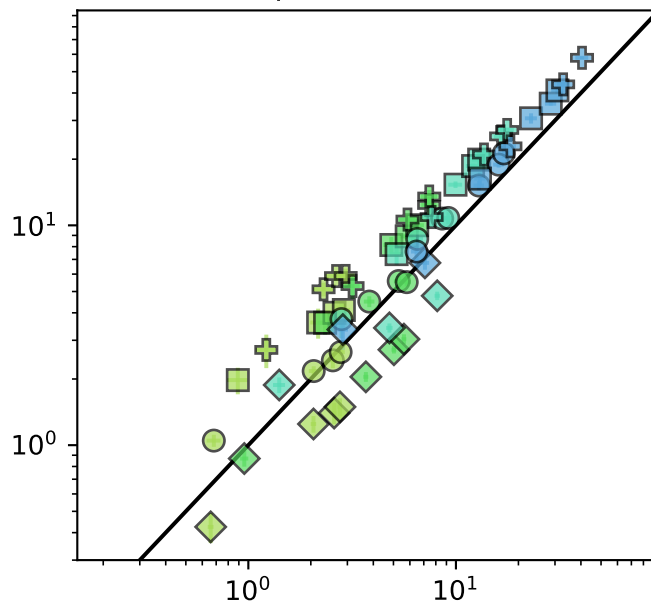 $\mu = 3.16e-06$ 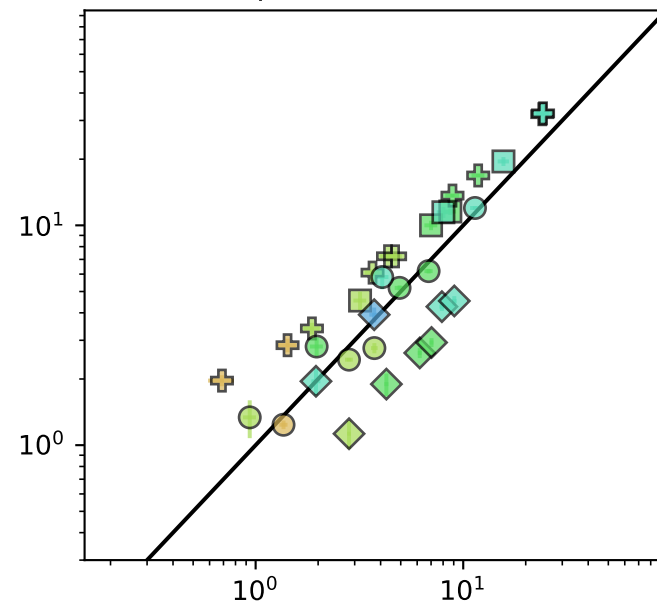 $\mu = 1e-05$ 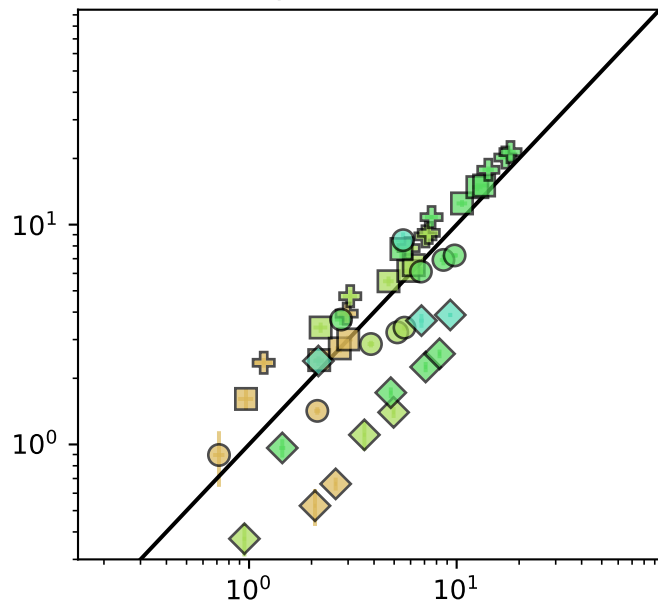 $\mu = 3.162e-05$ 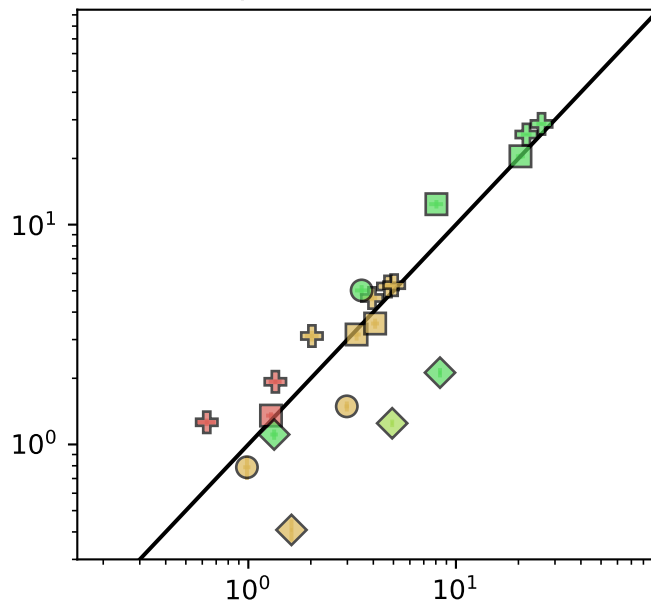 $\mu = 0.0001$ 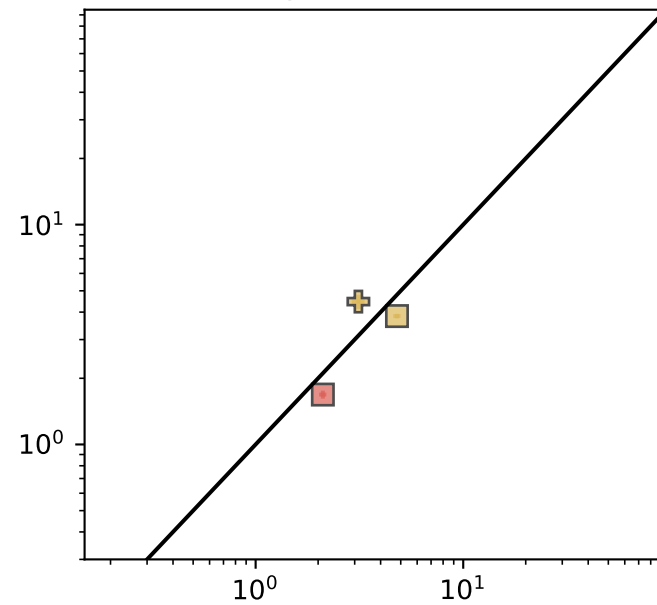

Simulation mean number of bacteria clones

Predicted mean number of bacteria clones
