# Supplementary figures and images for: Dynamics of immune memory and learning in bacterial communities
Source: eLife journal article supplement (doi:10.7554/elife.81692), 2023-01-16

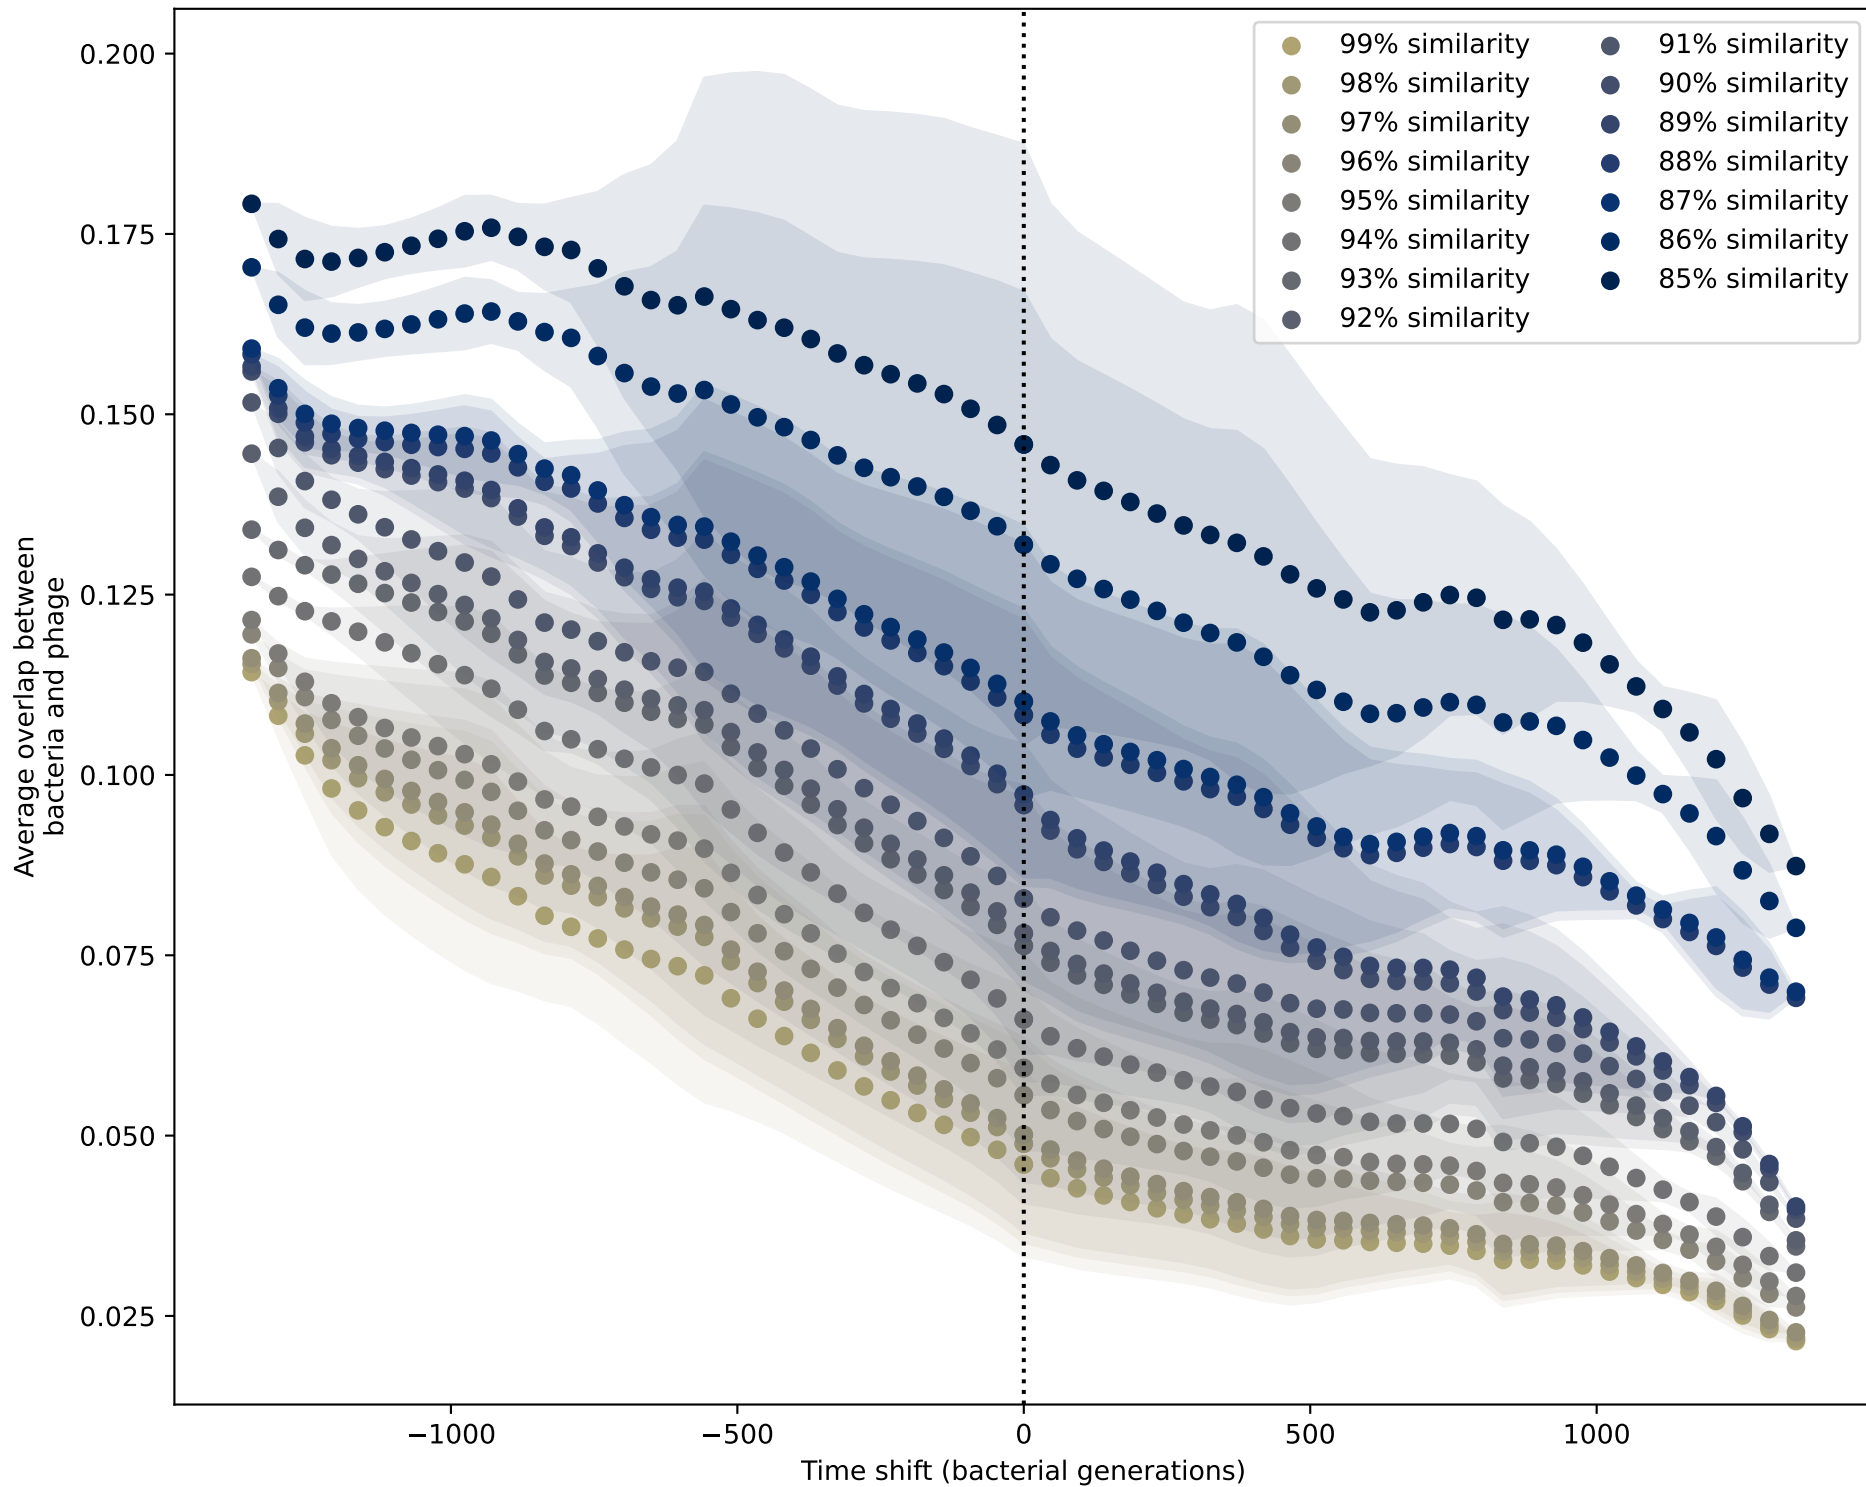

Supplement: supp [file elife-81692-supp-v1.zip]

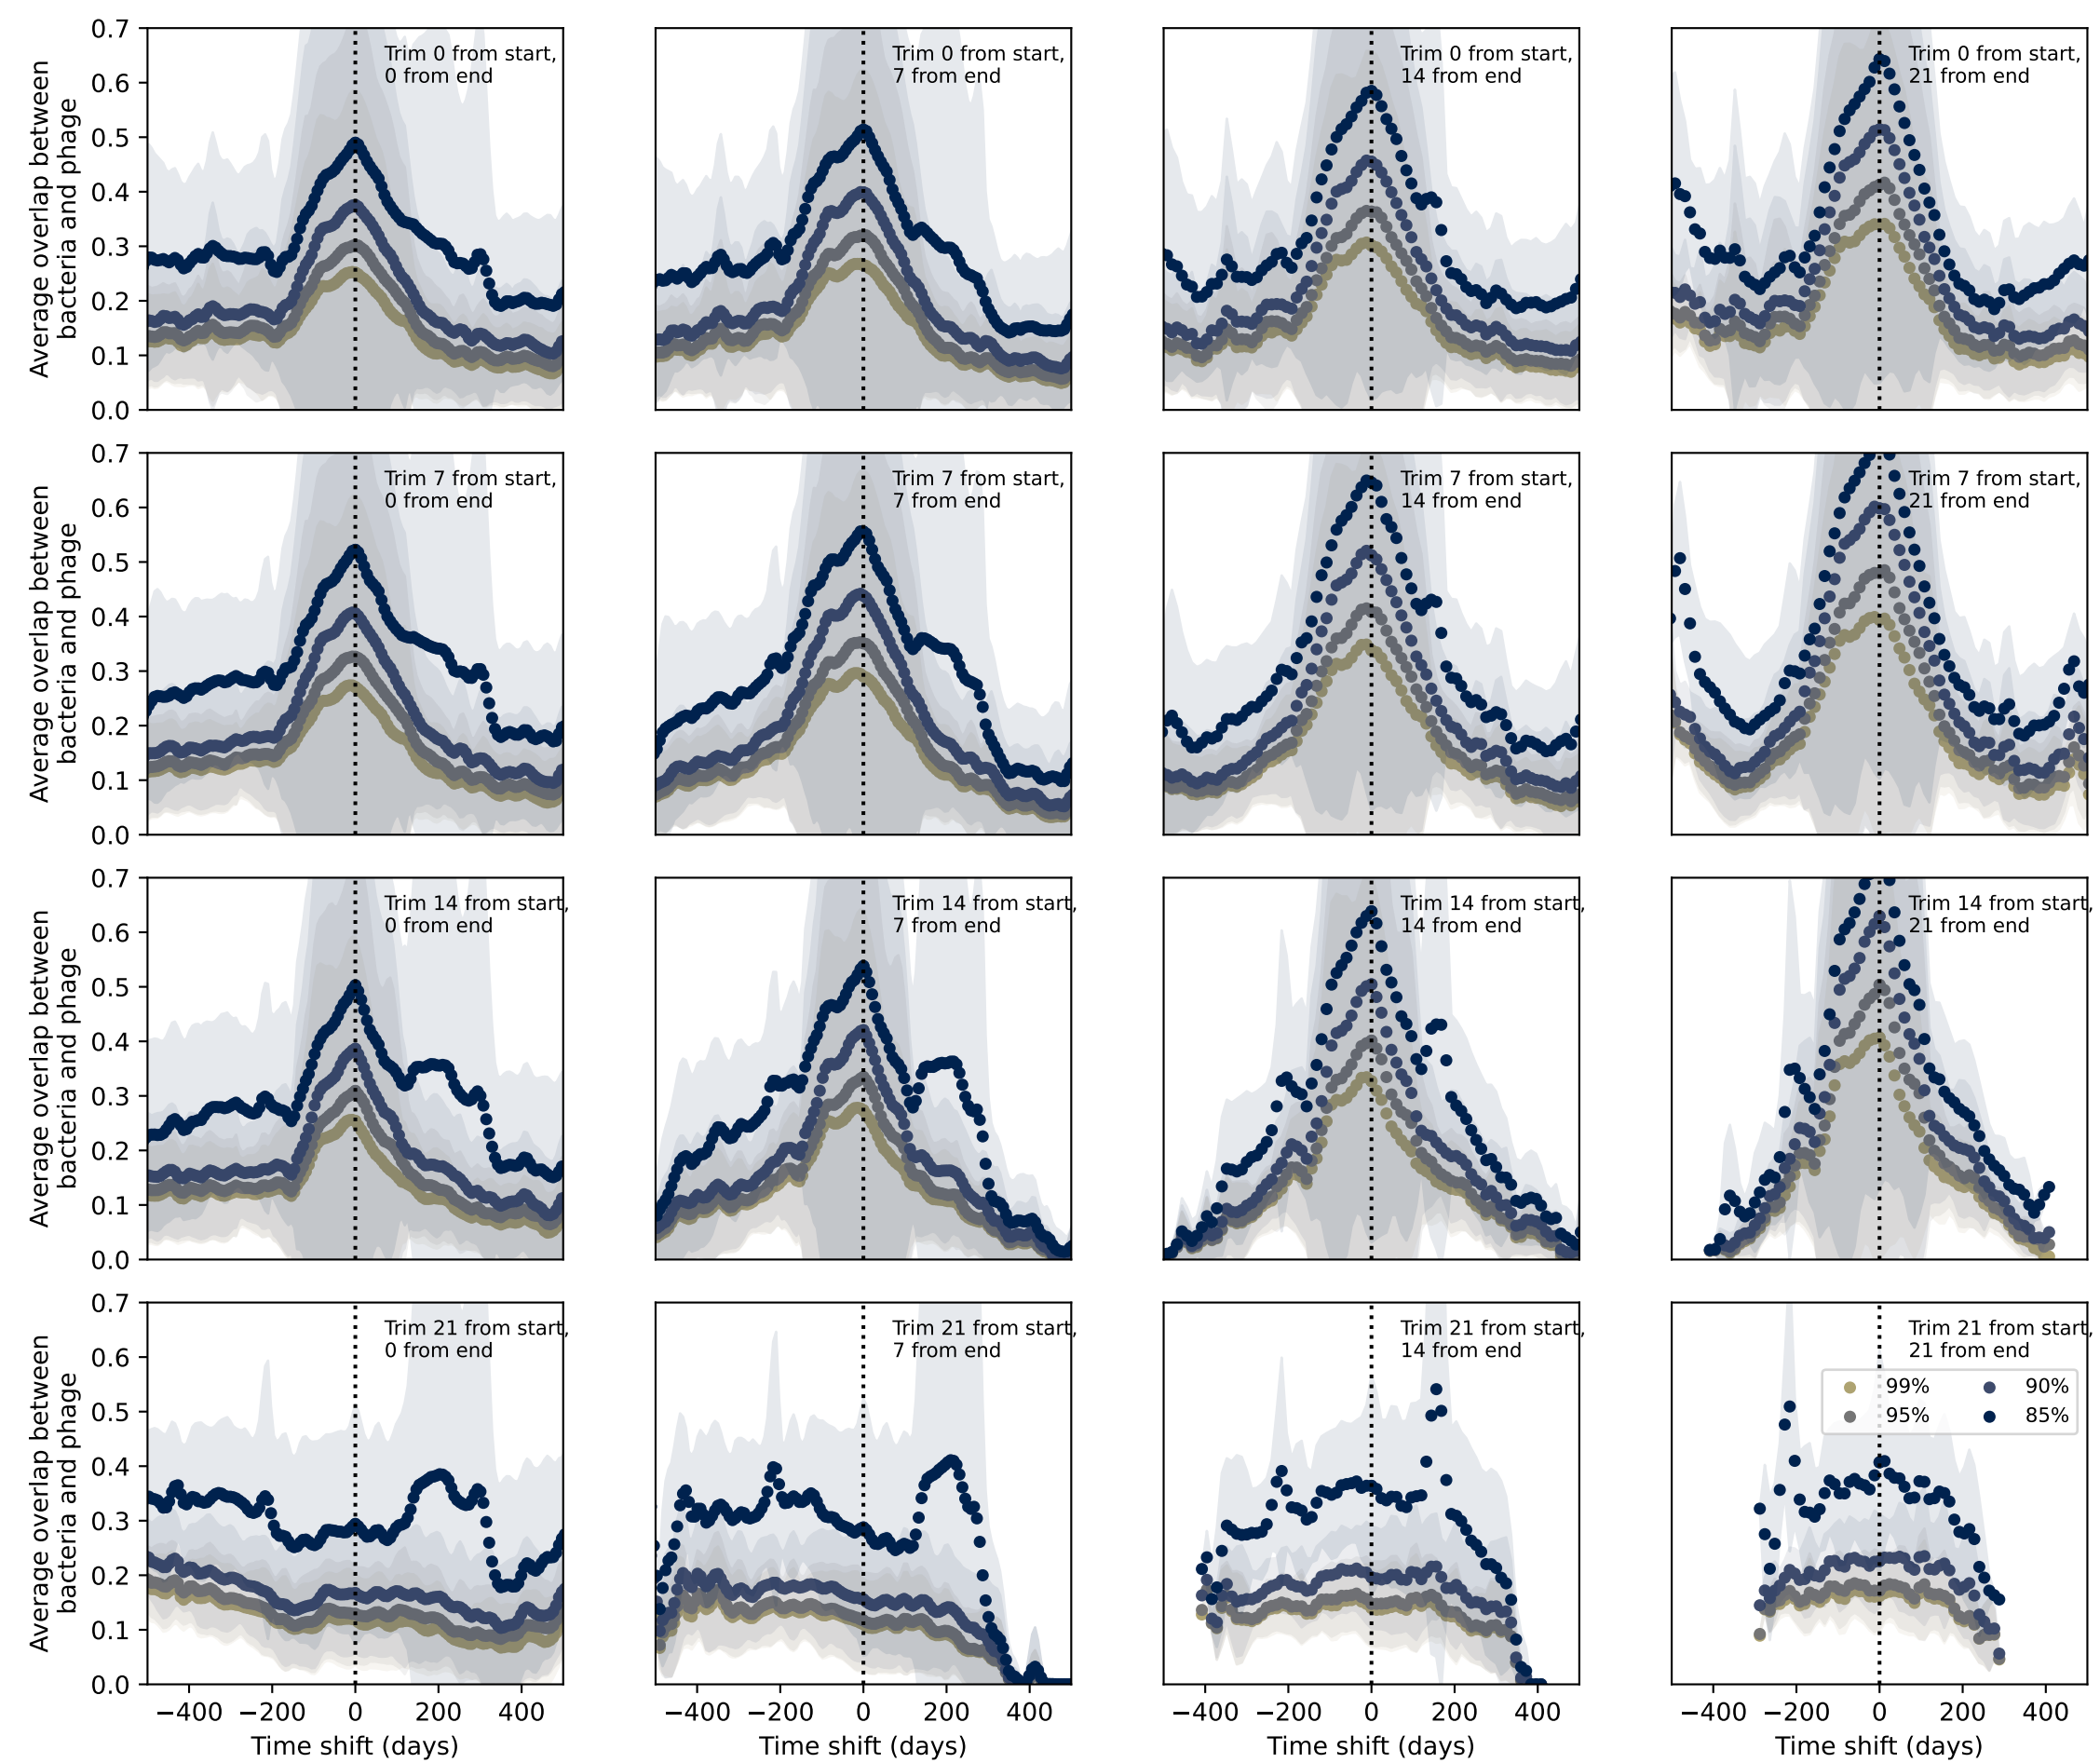

Supplement: supp [file elife-81692-supp-v1.zip]

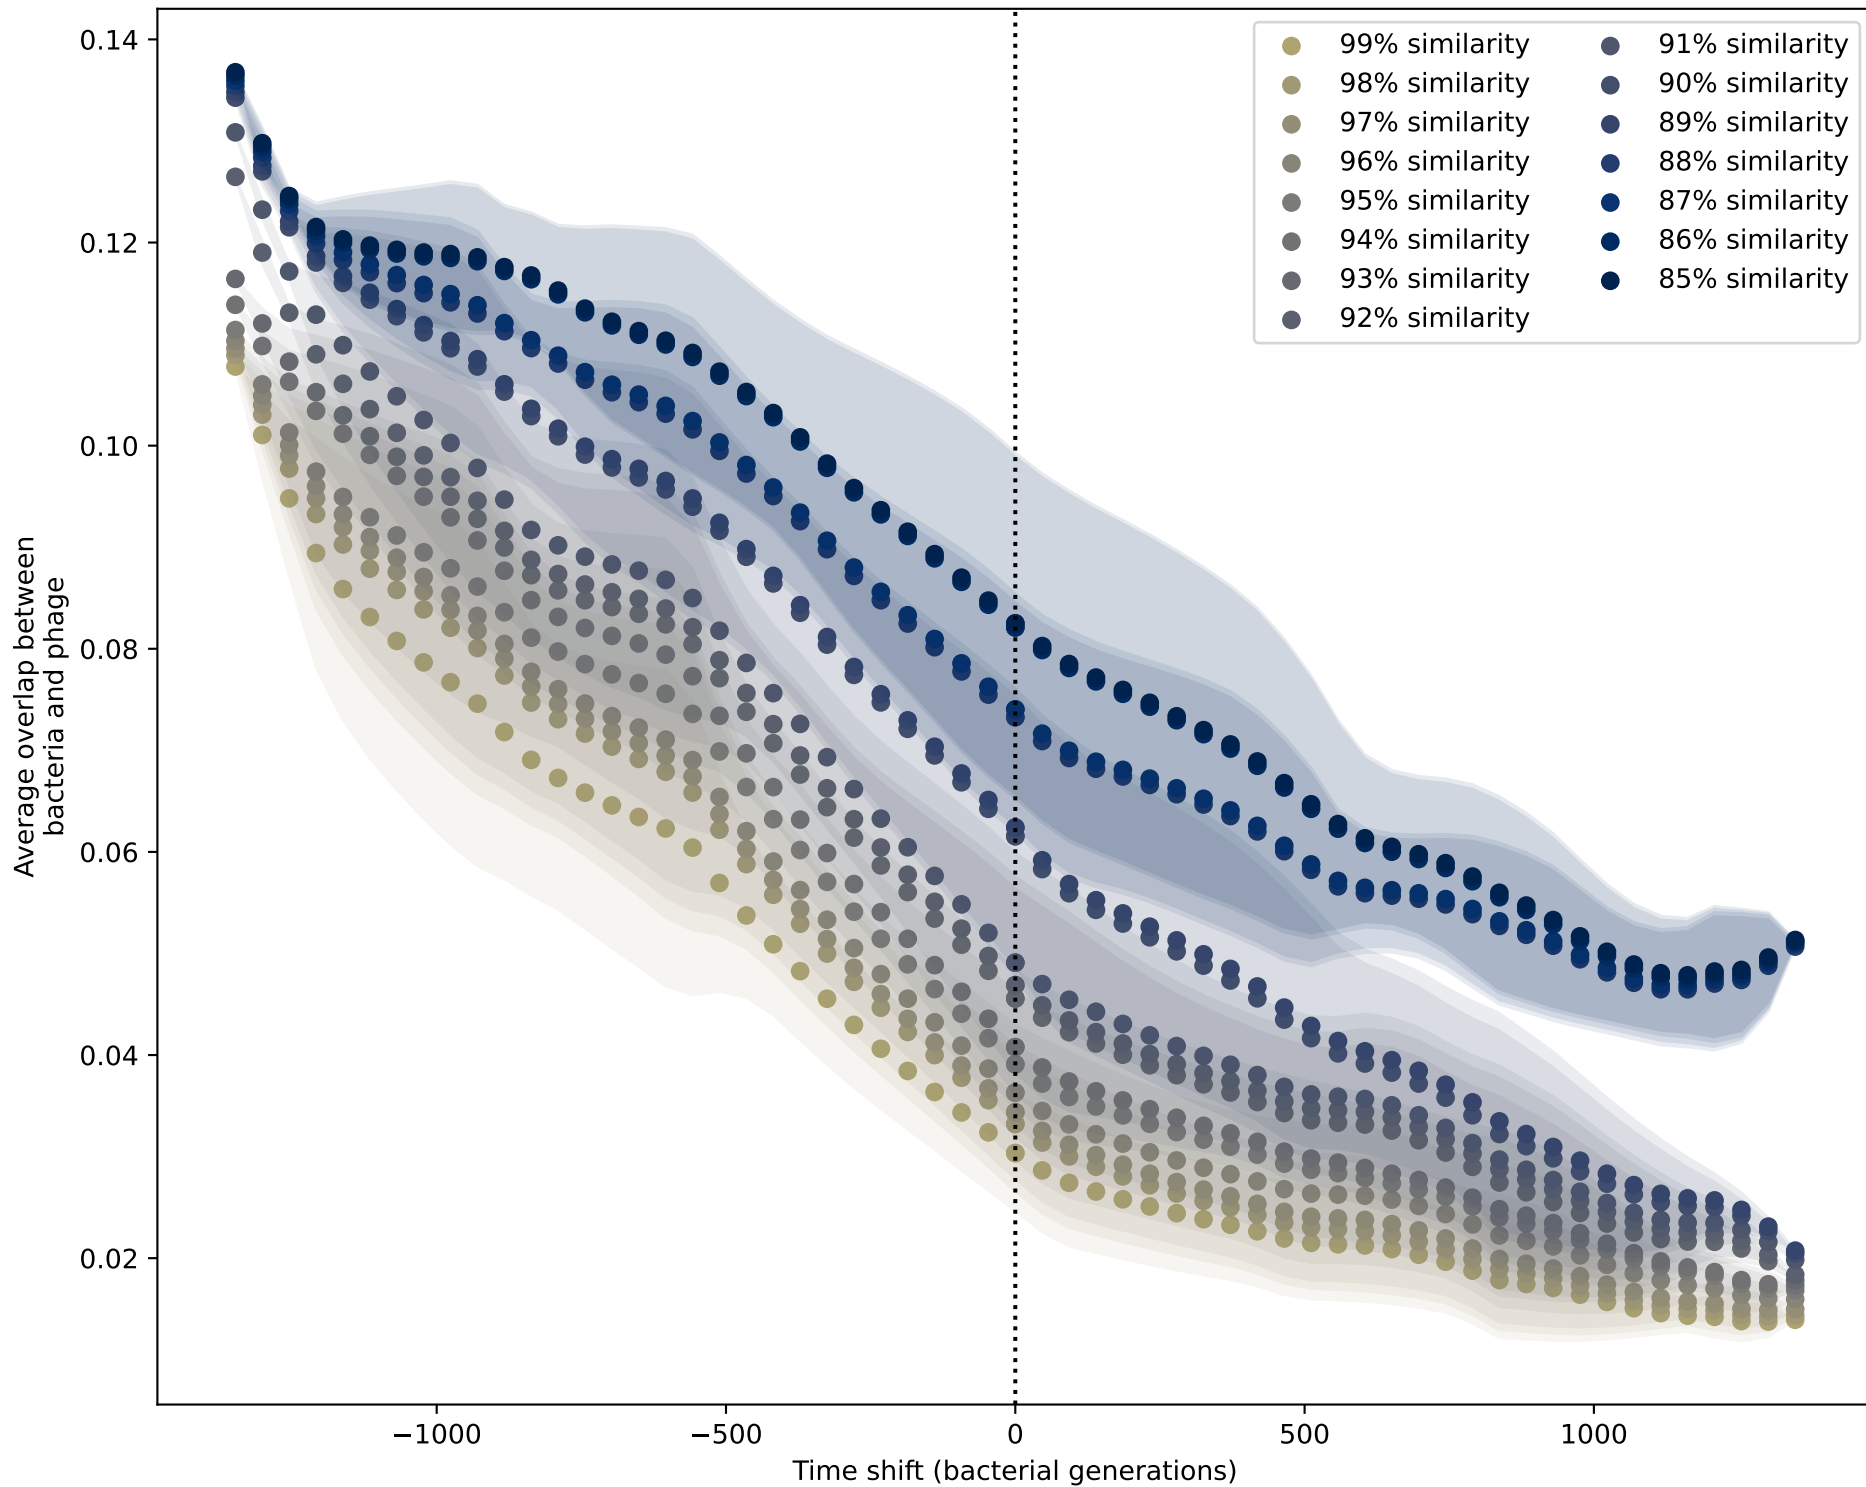

Supplement: supp [file elife-81692-supp-v1.zip]

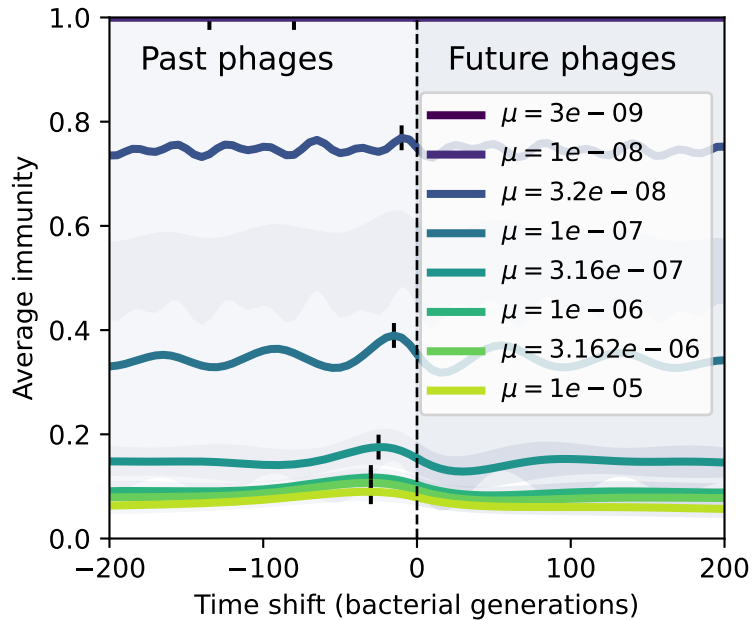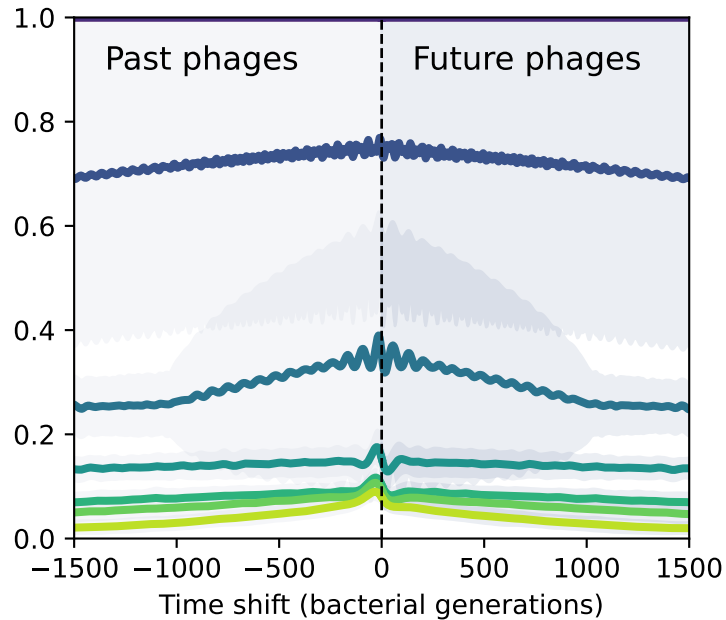

Supplement: supp [file elife-81692-supp-v1.zip]

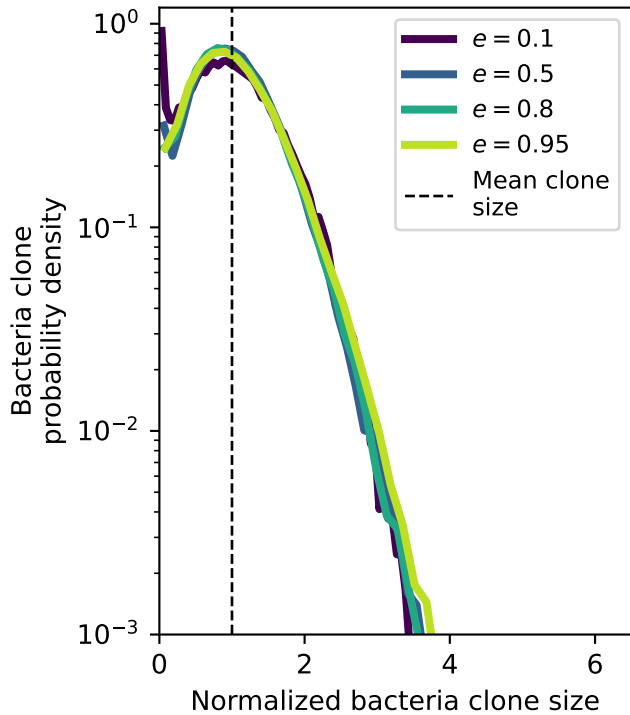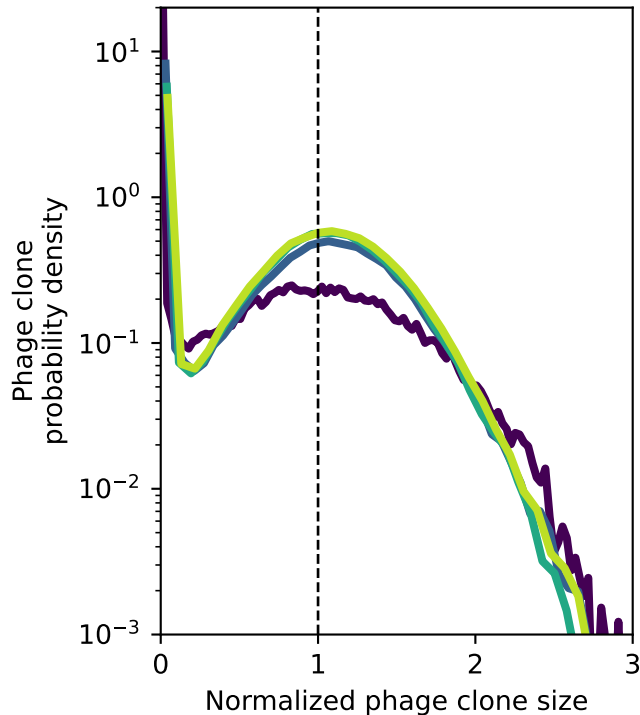

Supplement: supp [file elife-81692-supp-v1.zip]

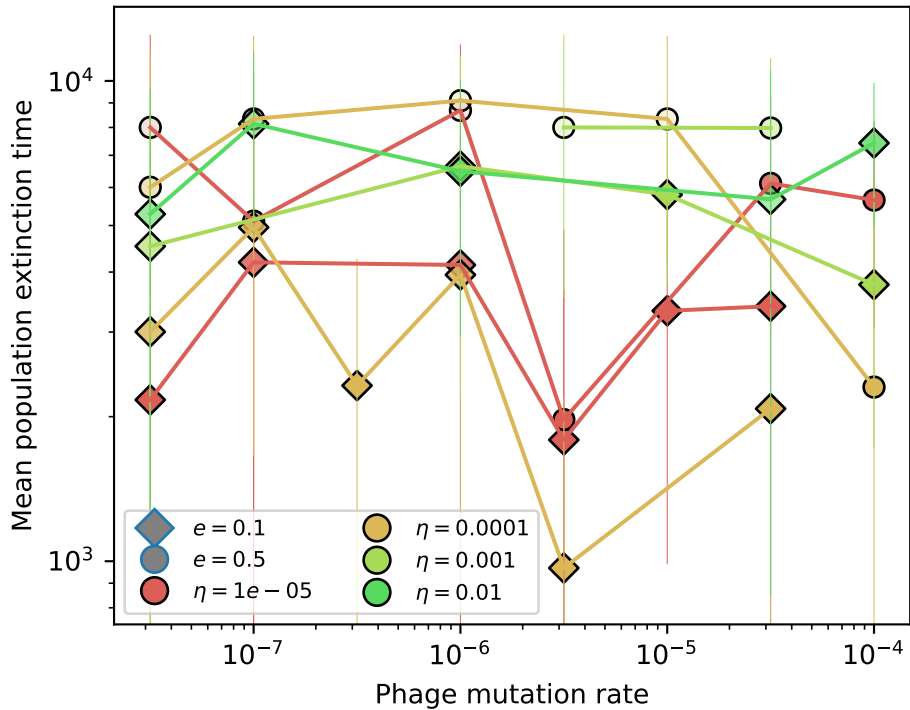

Supplement: supp [file elife-81692-supp-v1.zip]

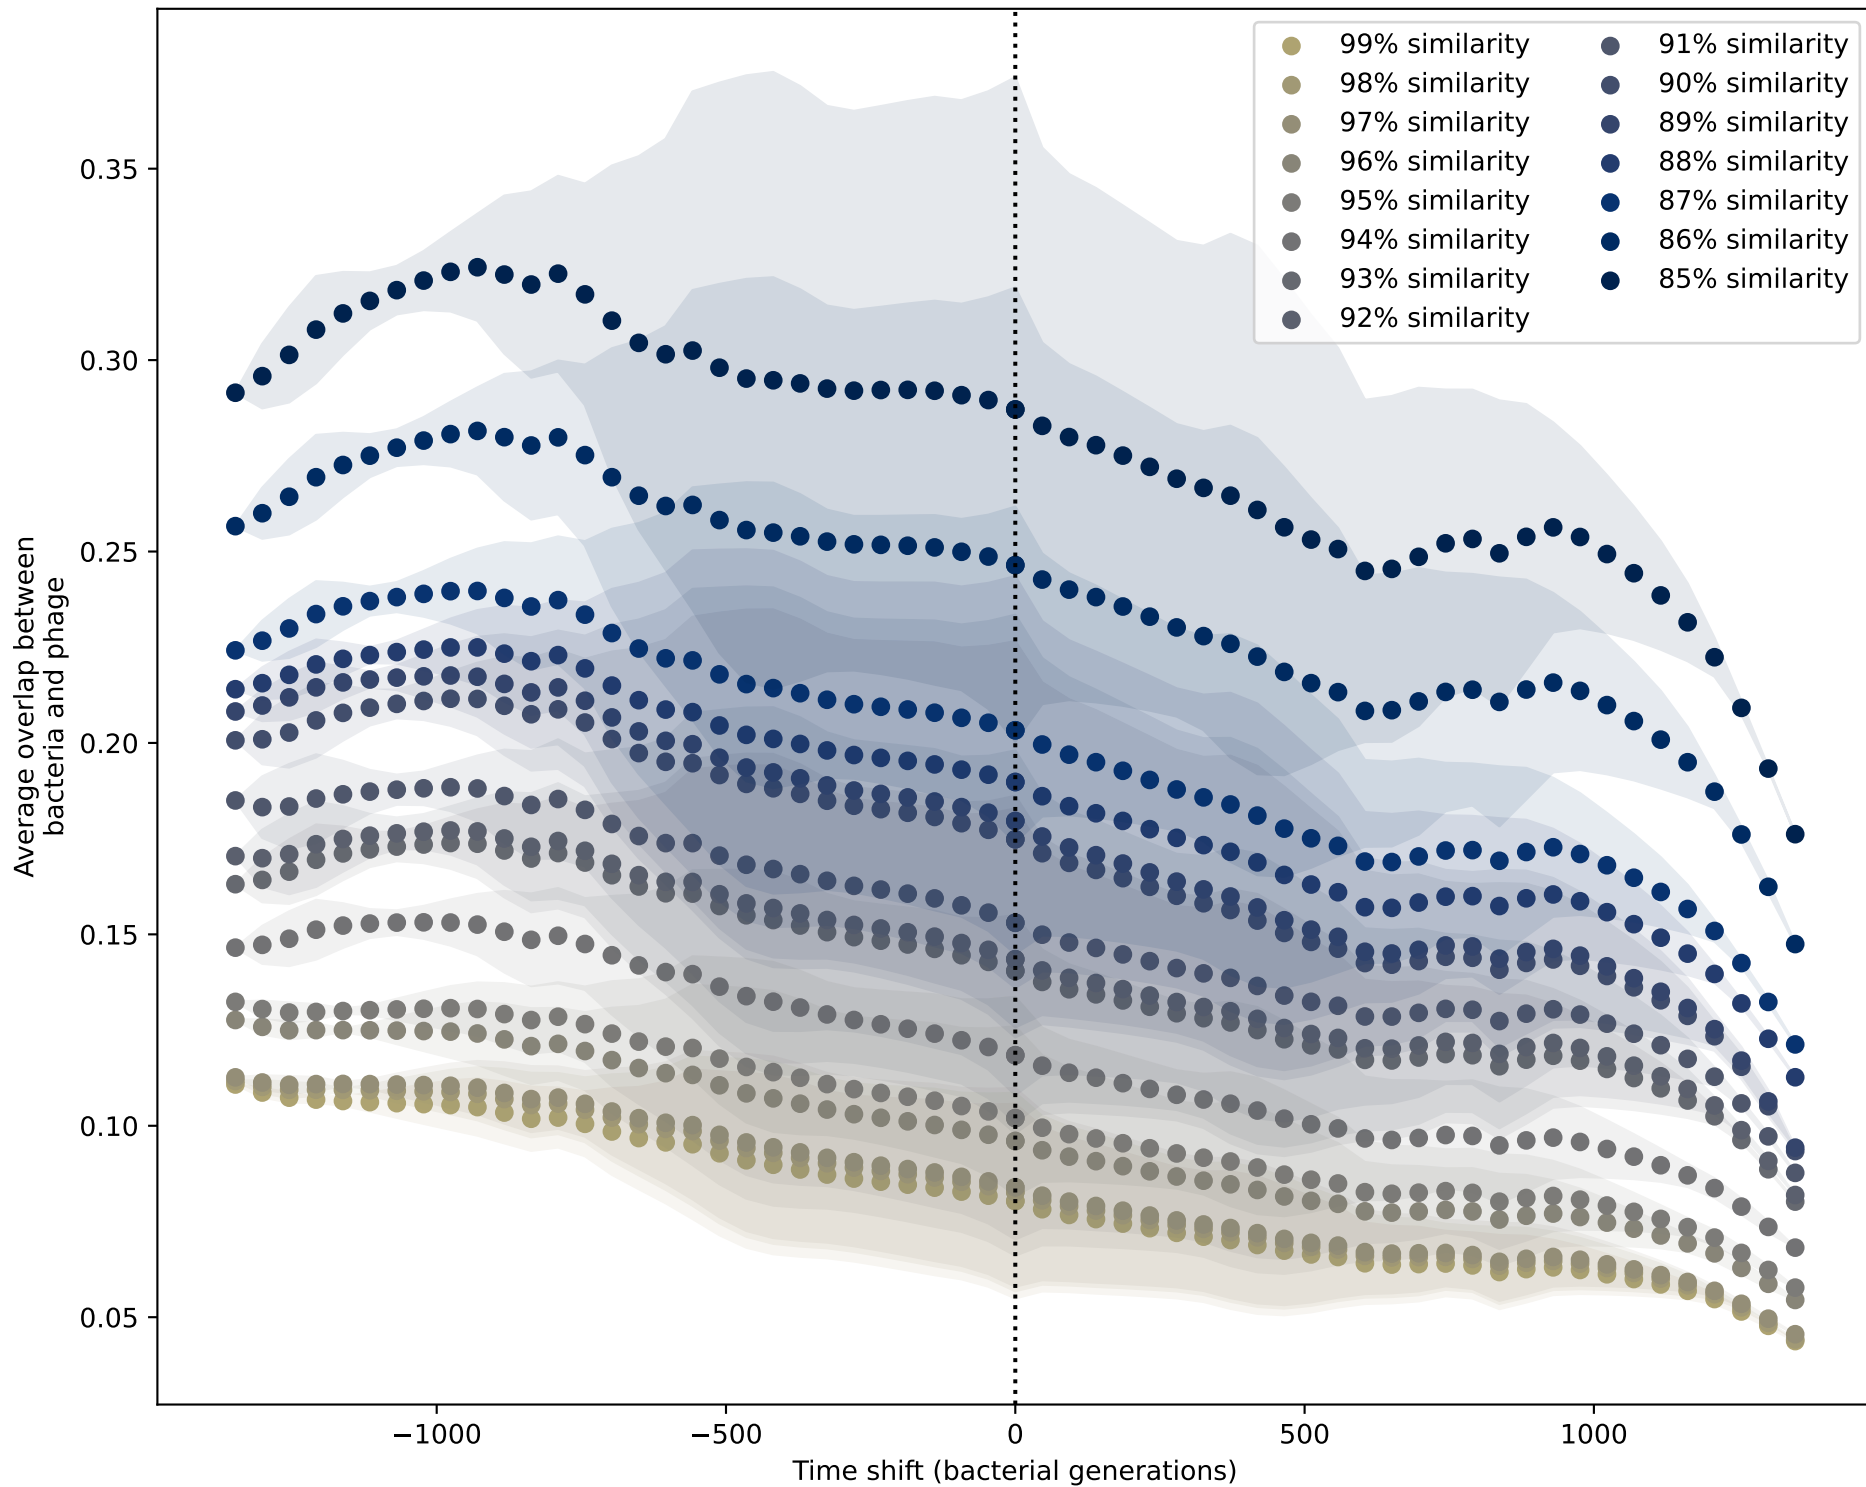

Supplement: supp [file elife-81692-supp-v1.zip]

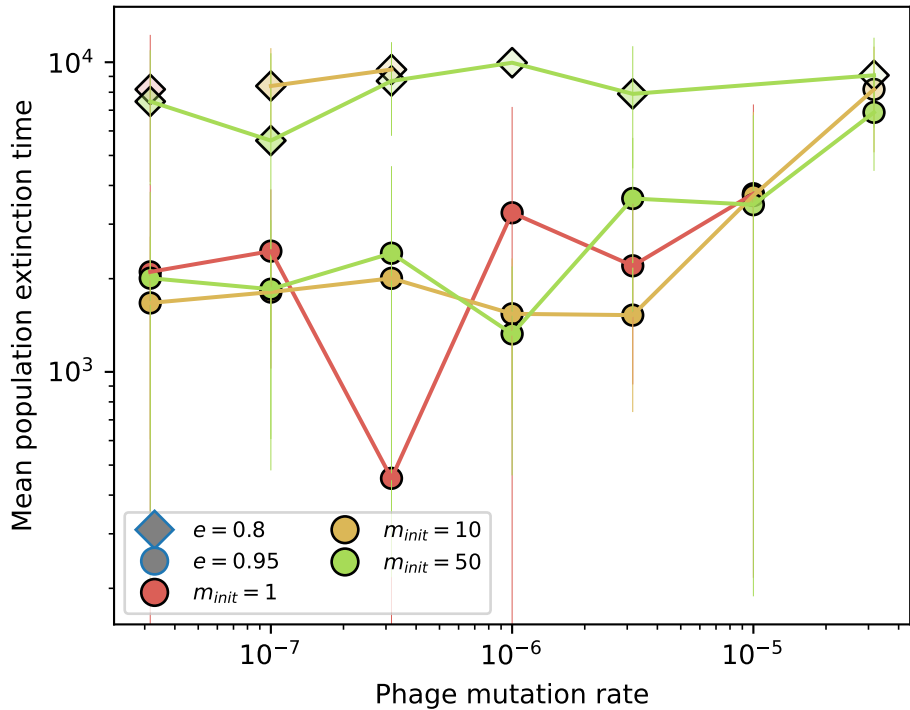

Supplement: supp [file elife-81692-supp-v1.zip]

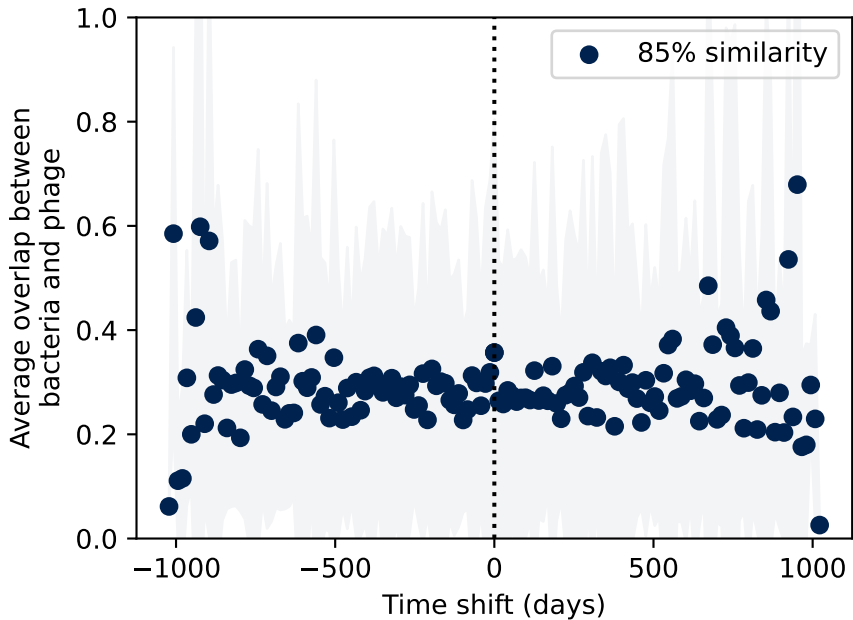

Supplement: supp [file elife-81692-supp-v1.zip]

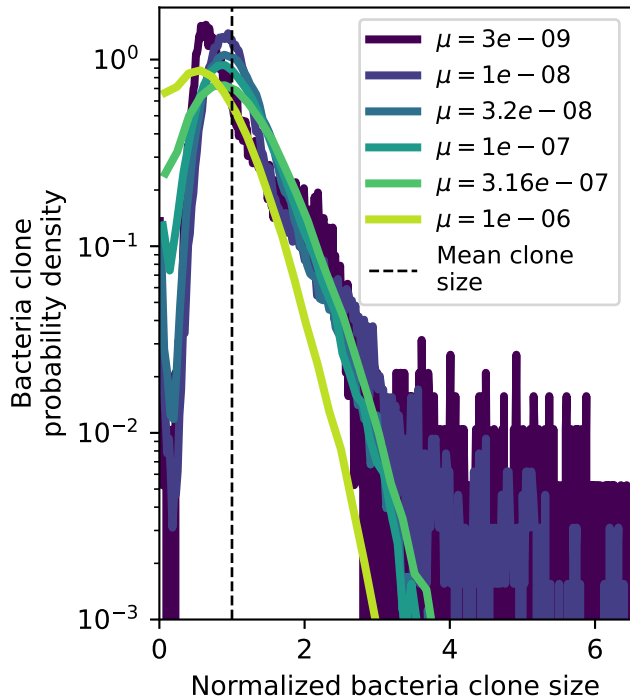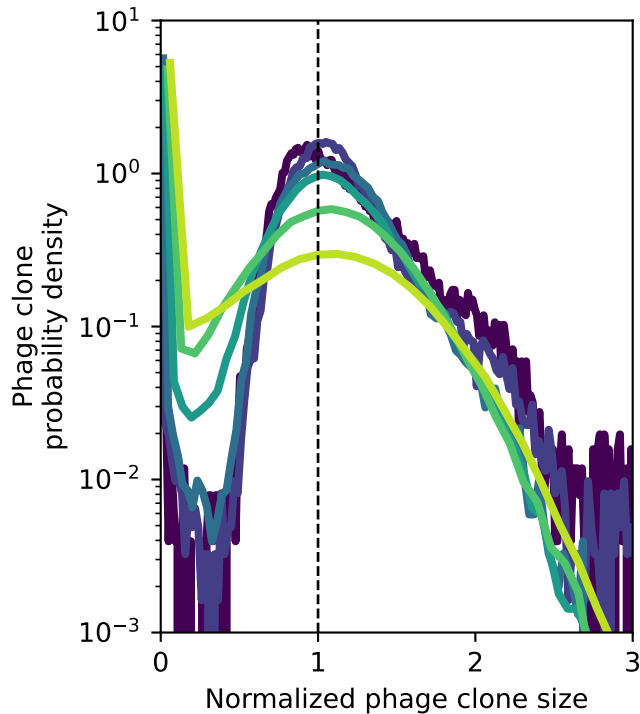

Supplement: supp [file elife-81692-supp-v1.zip]

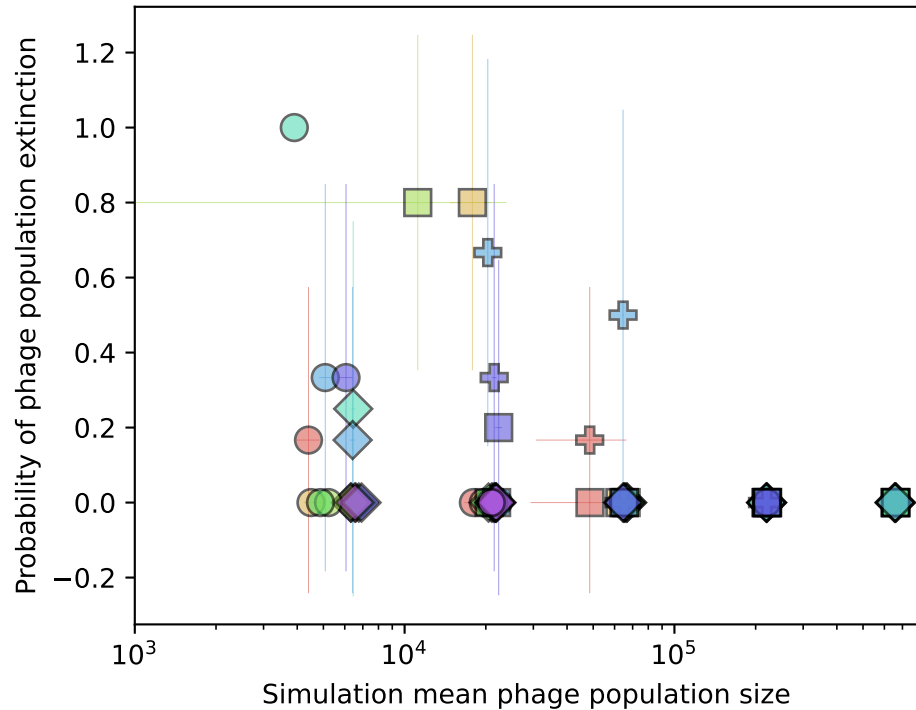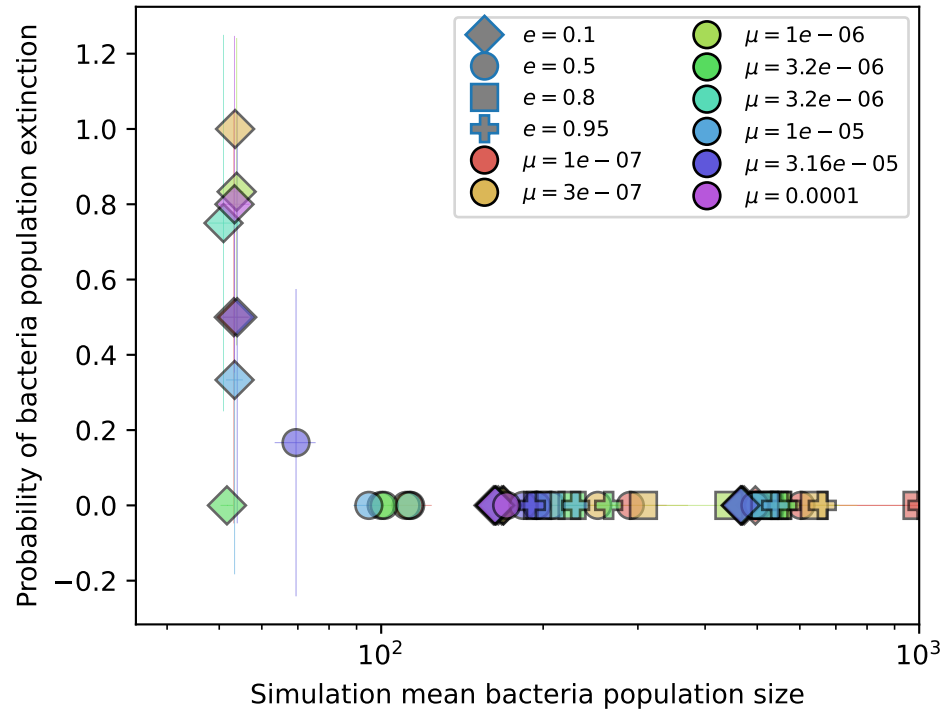

Supplement: supp [file elife-81692-supp-v1.zip]

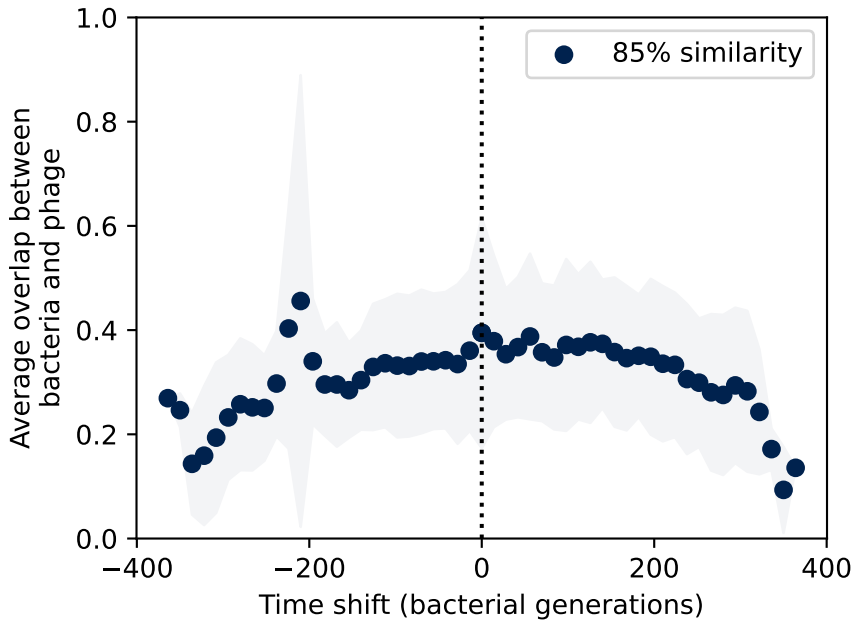

Supplement: supp [file elife-81692-supp-v1.zip]

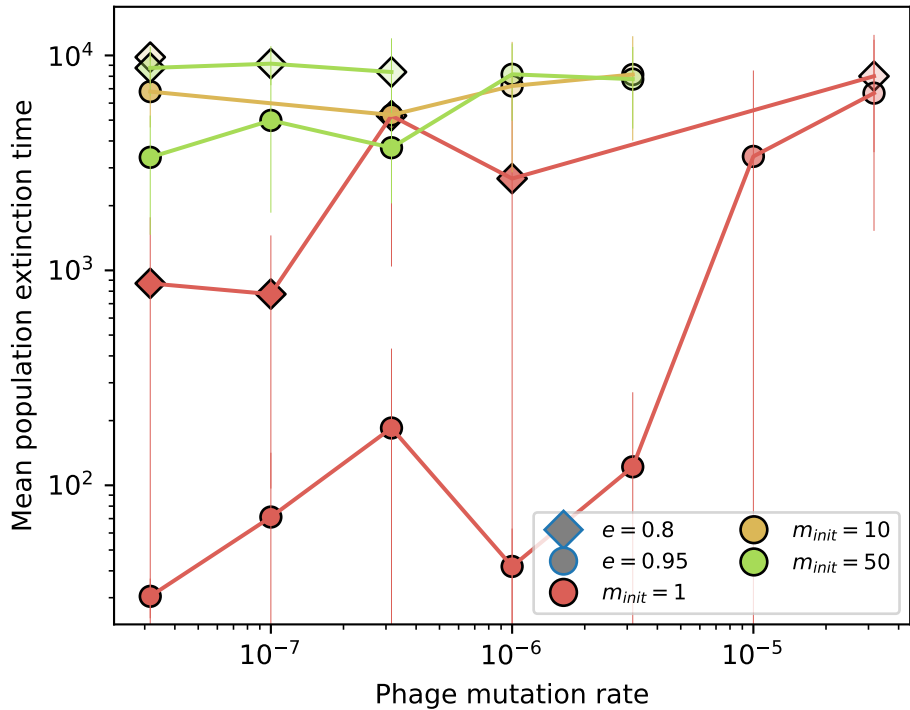

Supplement: supp [file elife-81692-supp-v1.zip]

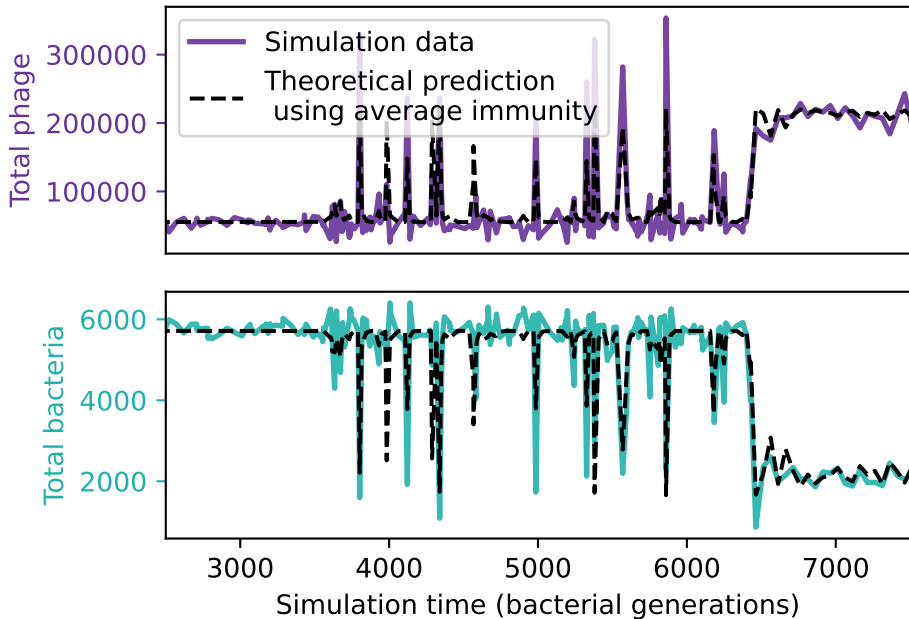

Supplement: supp [file elife-81692-supp-v1.zip]

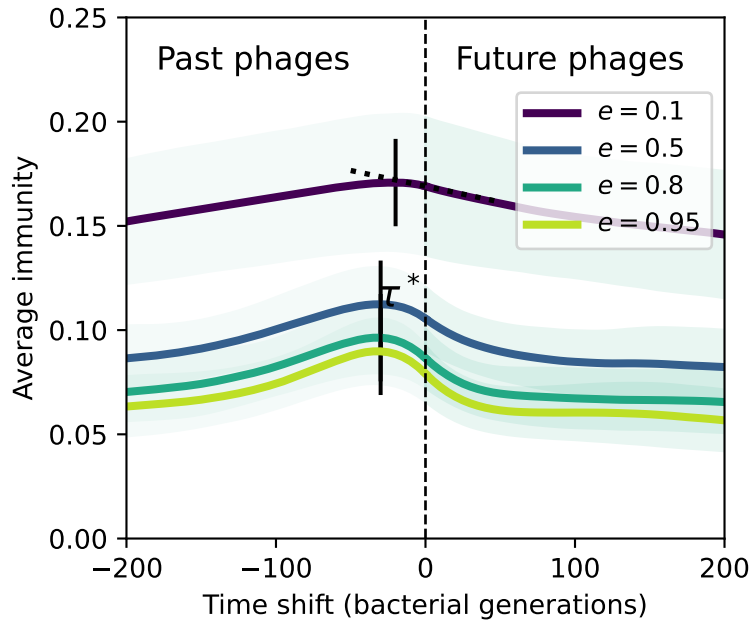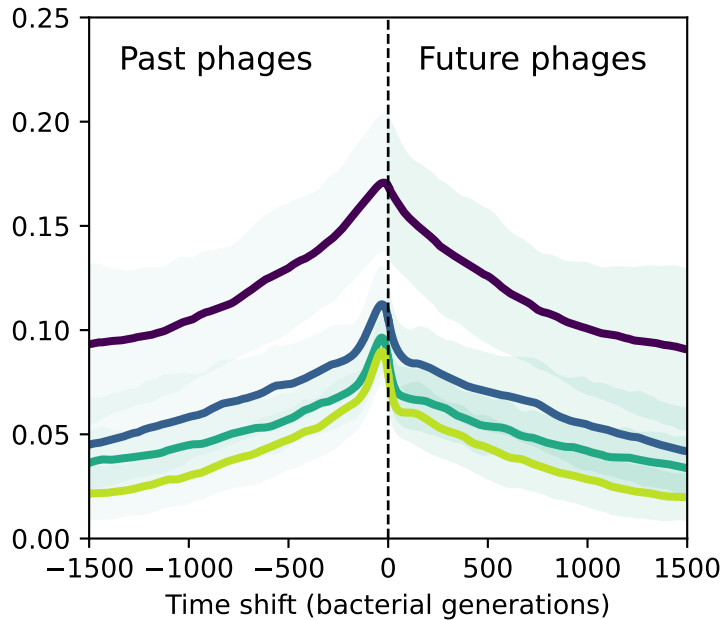

Supplement: supp [file elife-81692-supp-v1.zip]

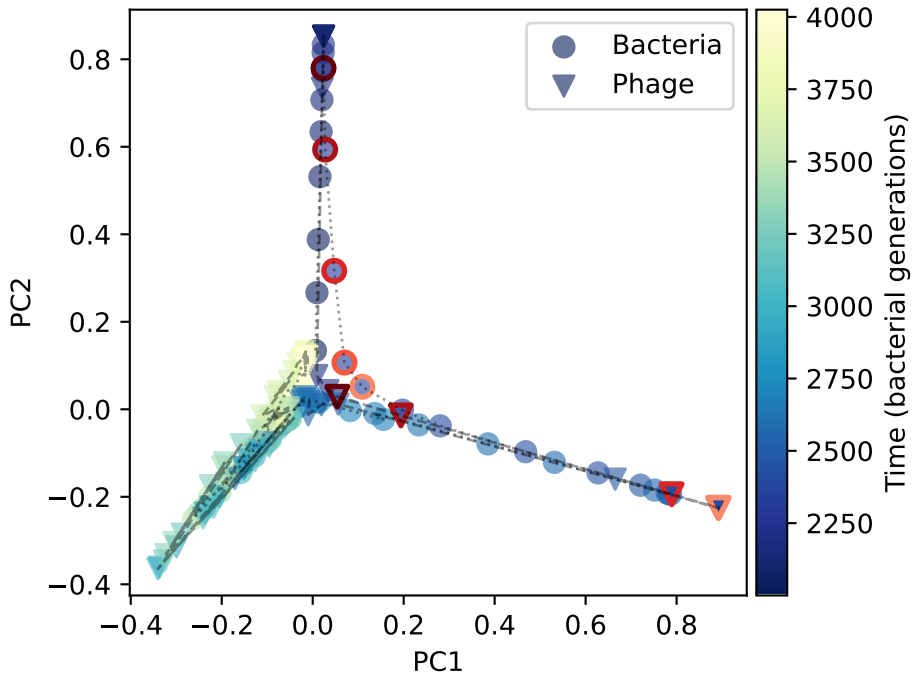

Supplement: supp [file elife-81692-supp-v1.zip]

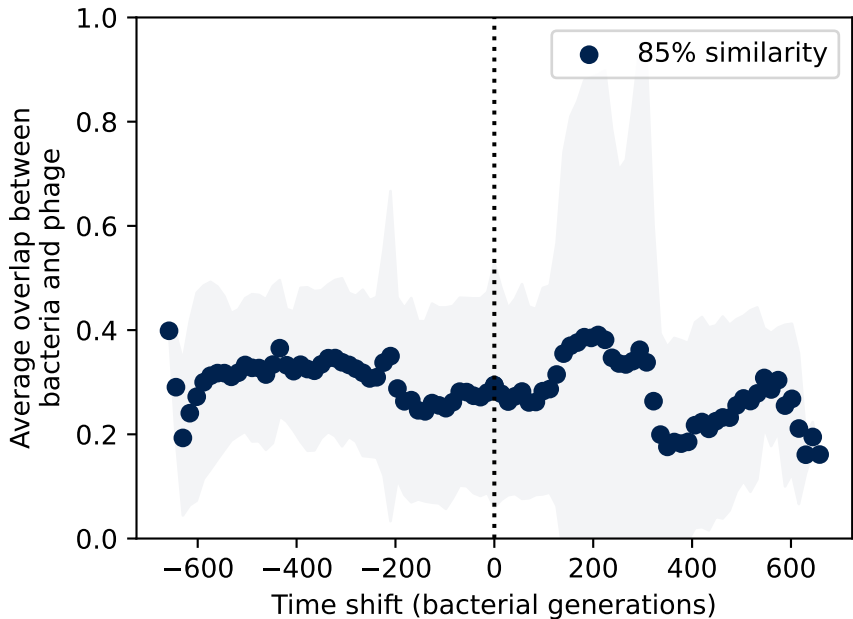

Supplement: supp [file elife-81692-supp-v1.zip]

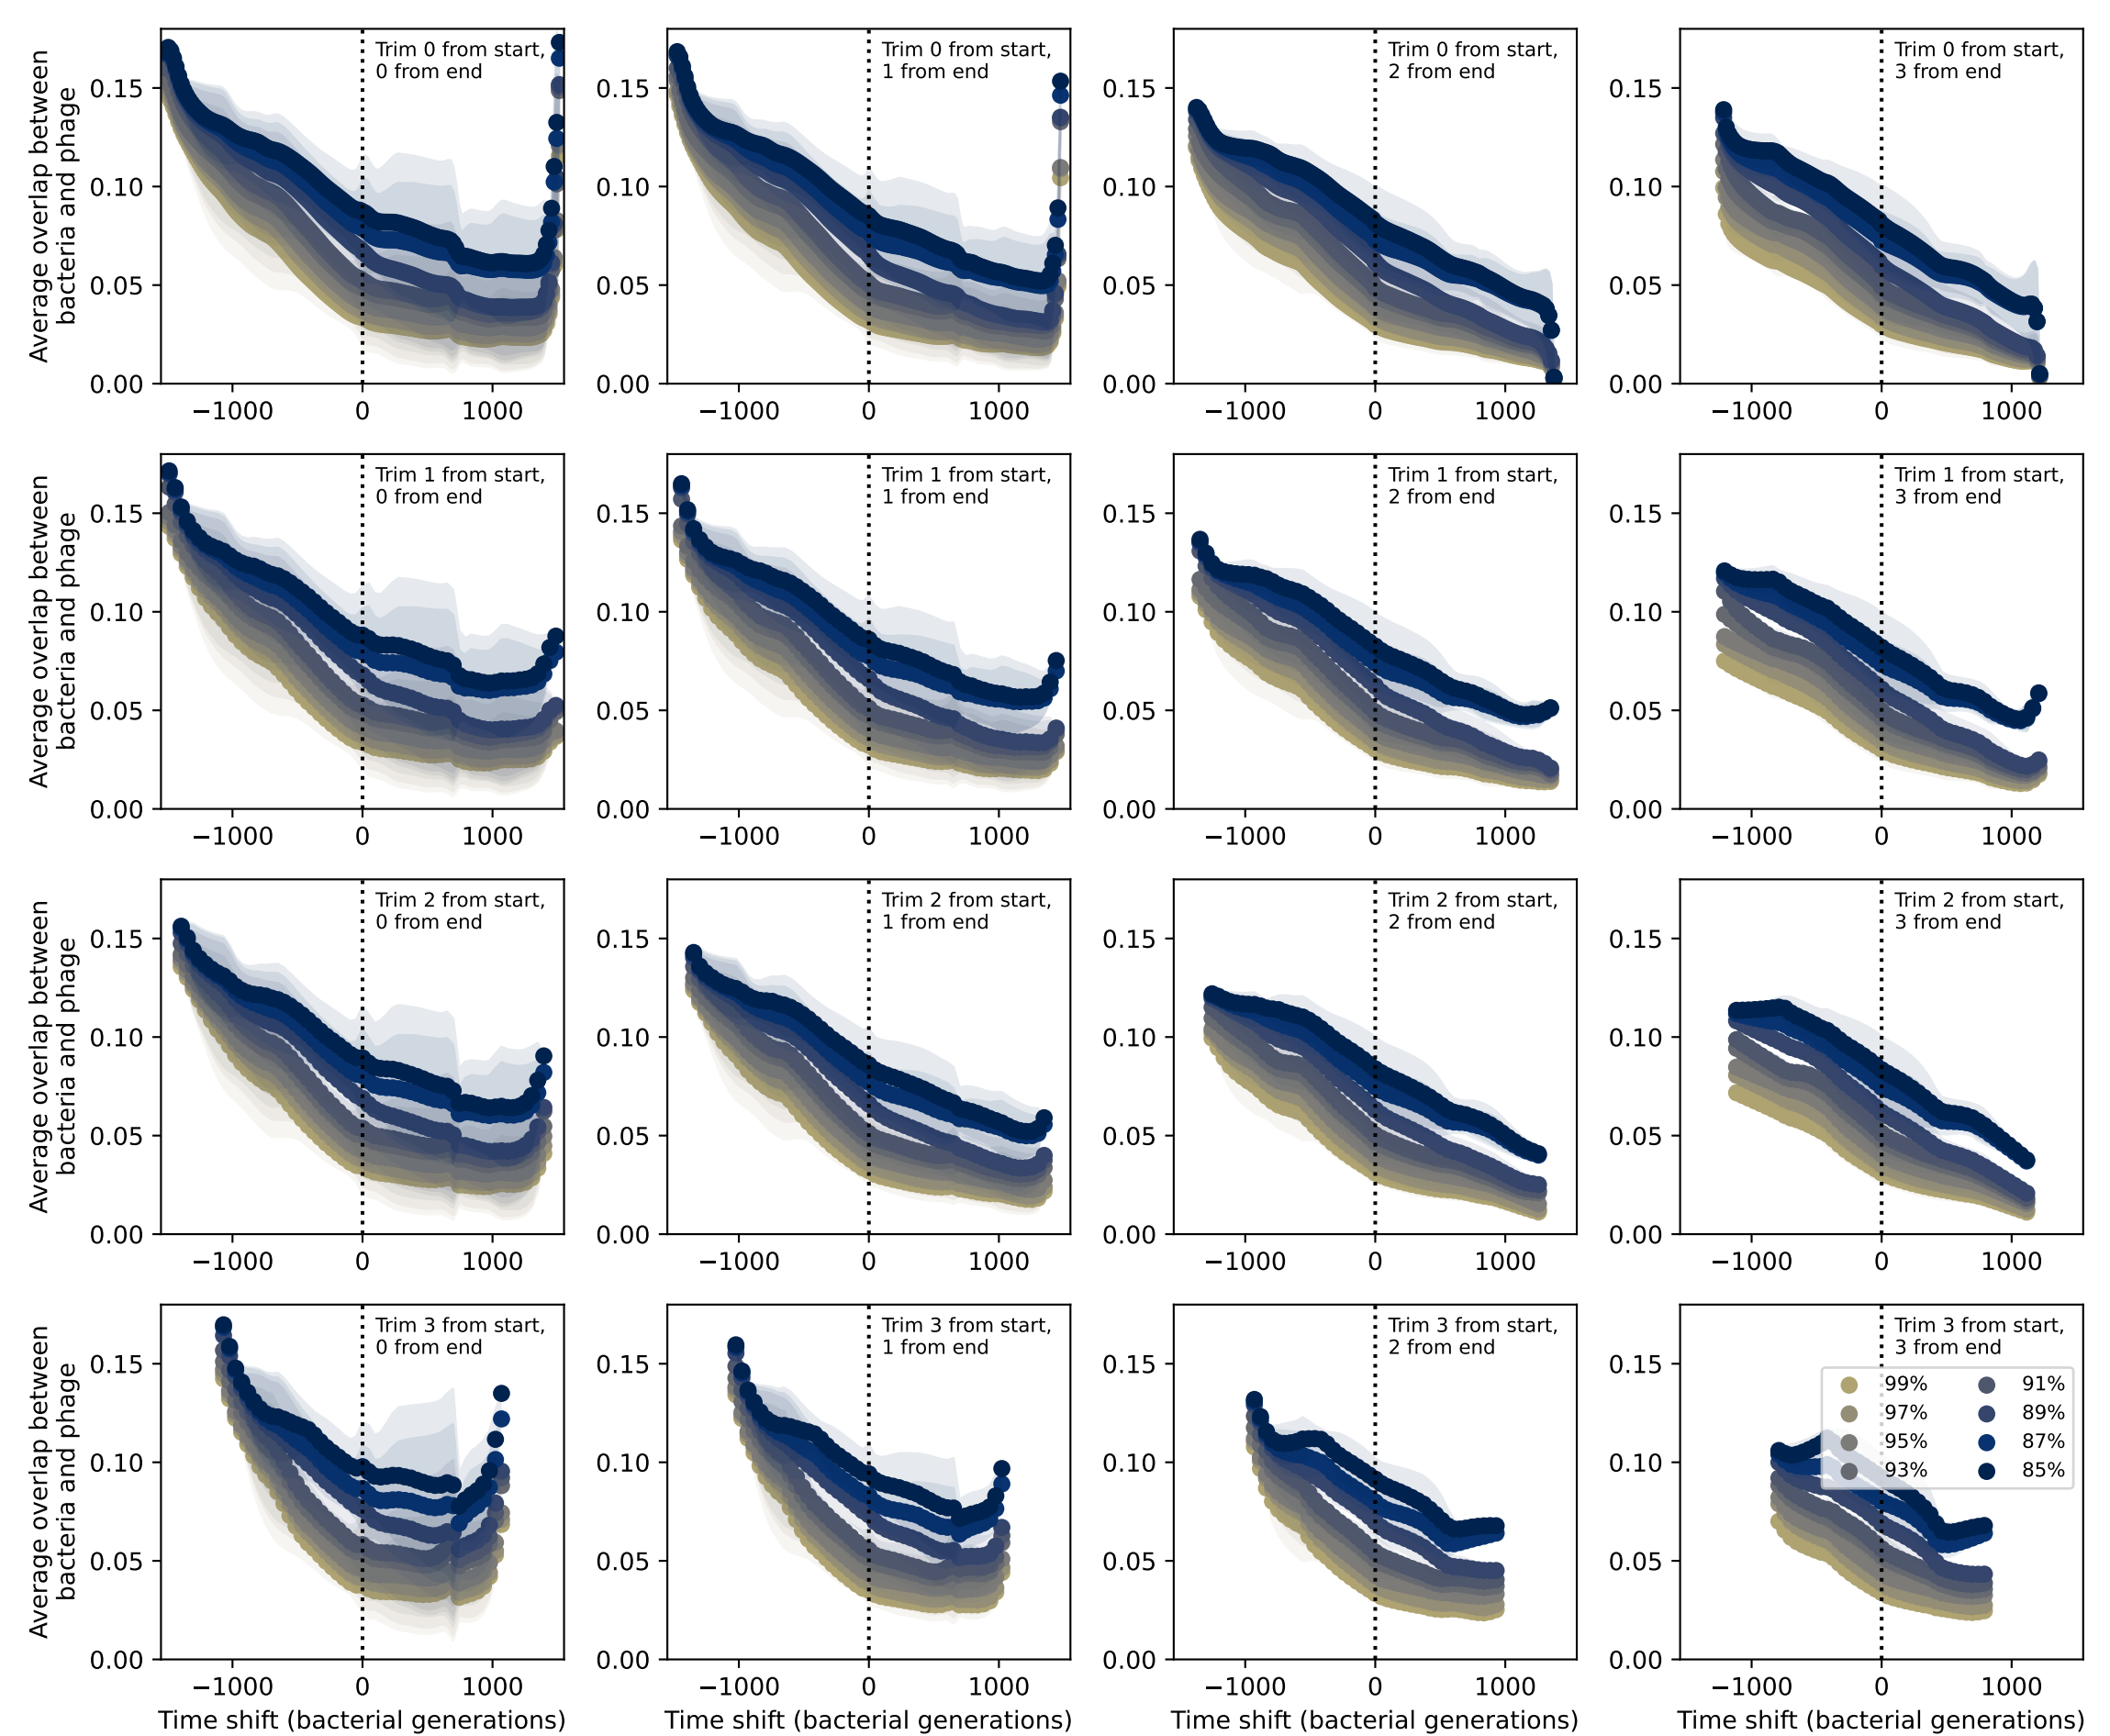

Supplement: supp [file elife-81692-supp-v1.zip]

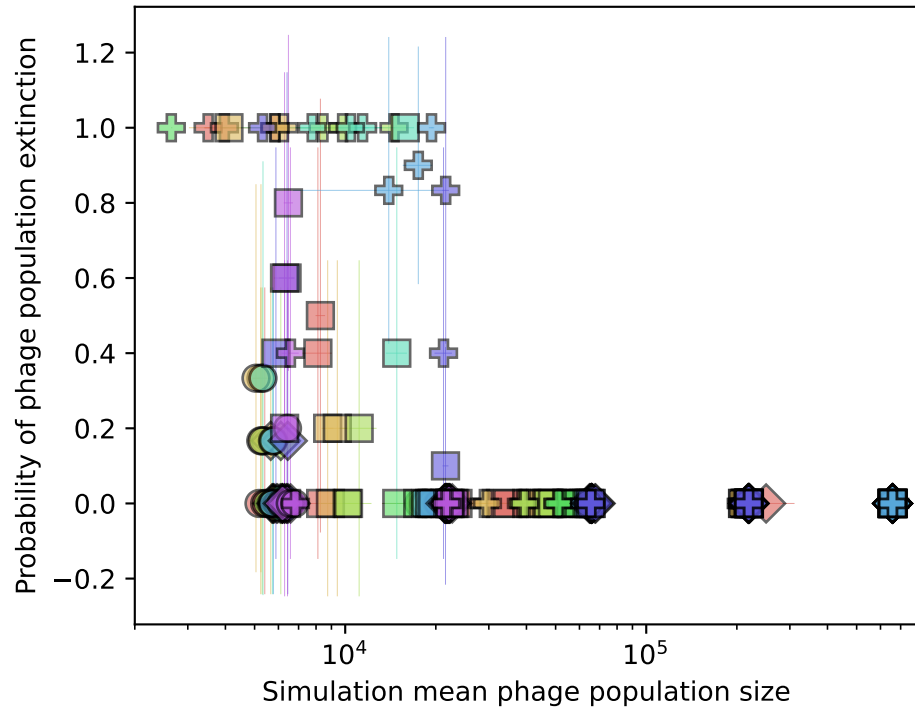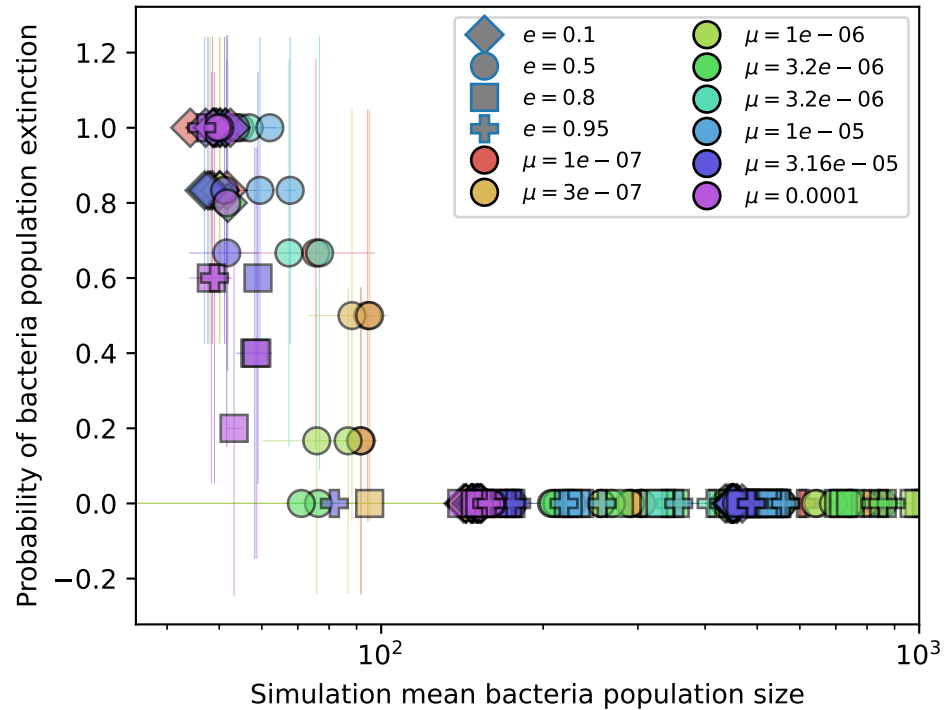

Supplement: supp [file elife-81692-supp-v1.zip]

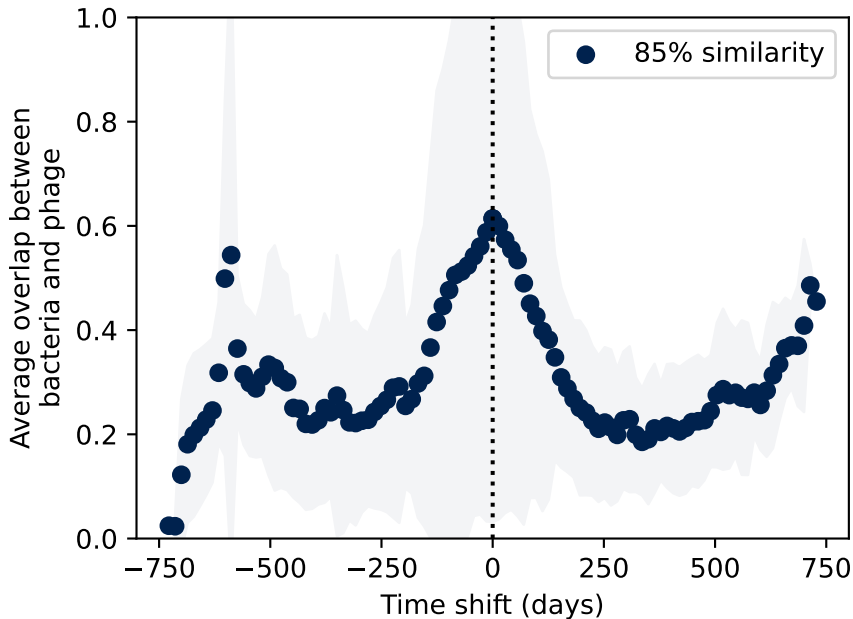

Supplement: supp [file elife-81692-supp-v1.zip]

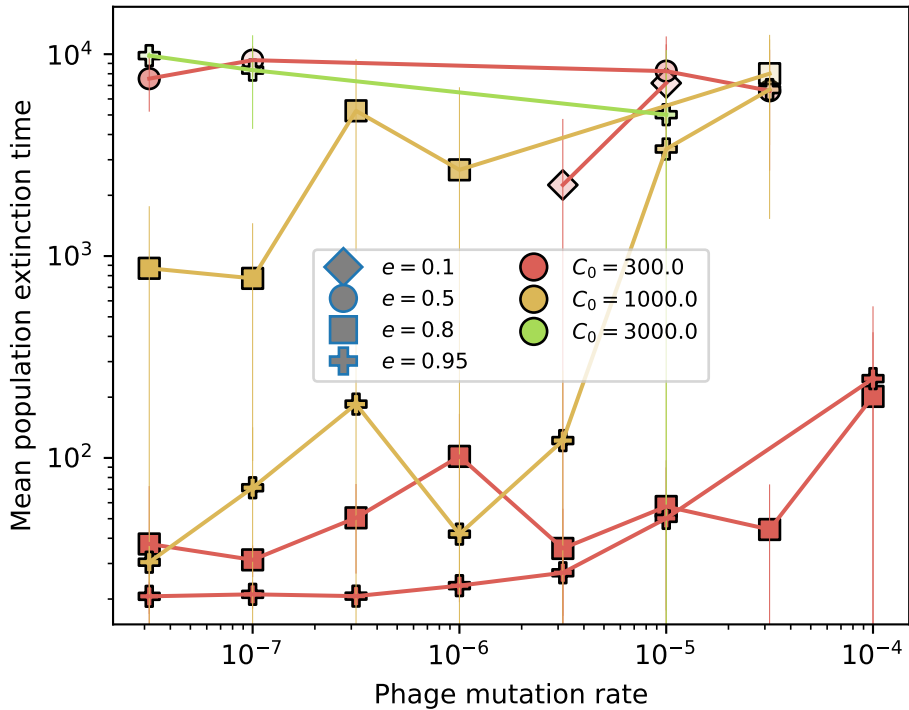

Supplement: supp [file elife-81692-supp-v1.zip]

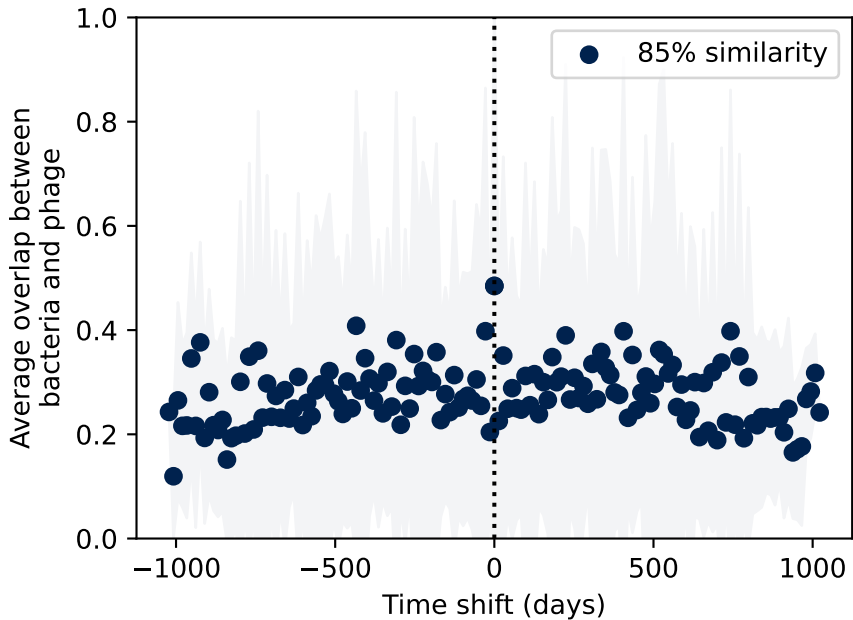

Supplement: supp [file elife-81692-supp-v1.zip]

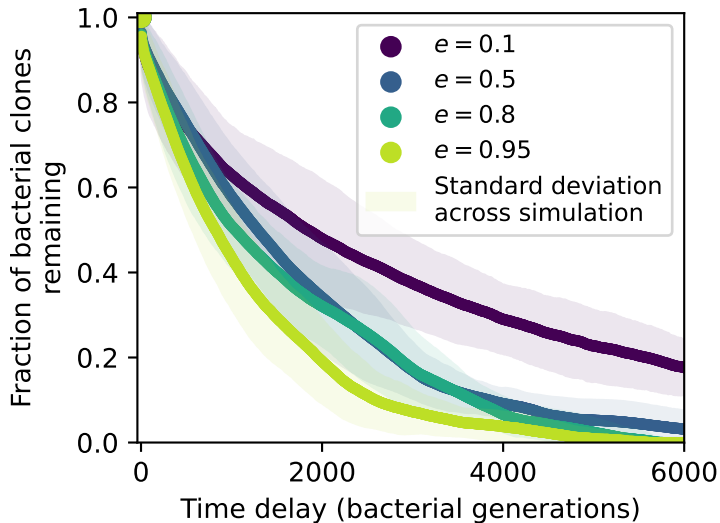

Supplement: supp [file elife-81692-supp-v1.zip]

Fraction of bacterial clones remaining

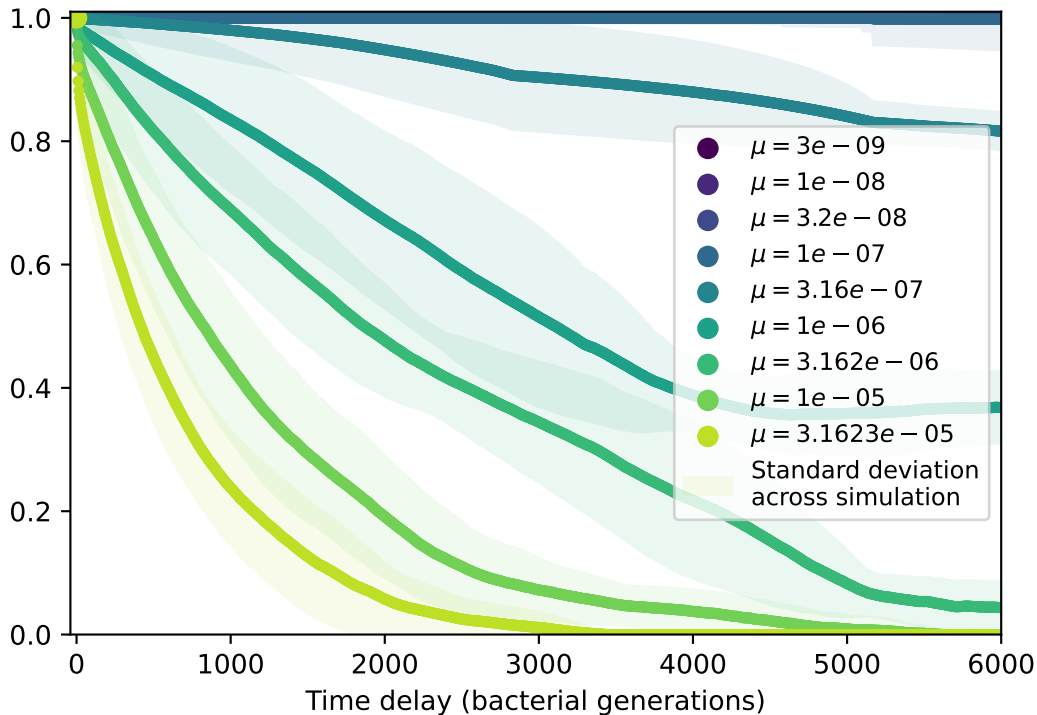

Supplement: supp [file elife-81692-supp-v1.zip]
